# Supplementary material for: Identification of an Unusual Pattern of Global Gene Expression in Group B Streptococcus Grown in Human Blood
Source: PubMed Central journal article supplement (PMC2745576; doi:10.1371/journal.pone.0007145), 2009-09-23
Supplement: pone.0007145.s001.pdf [file pone.0007145.s001.pdf]

| Sample       | MIF     | tPAI-1 | Eotaxin | G-CSF | GM-CSF | IFN- $\alpha$ | IFN- $\gamma$ | IL-1 $\alpha$ | IL-1 $\beta$ | IL-2 | IL-3 | IL-4 | IL-5 | IL-6  | IL-7 |
|--------------|---------|--------|---------|-------|--------|---------------|---------------|---------------|--------------|------|------|------|------|-------|------|
| Donor A (T0) | 1 495   | 16 999 | 265     | 17    | 0      | 0             | 0             | 32            | 17           | 51   | 0    | 0    | 0    | 12    | 0    |
| Donor B (T0) | 2 407   | 3 097  | 392     | 28    | 1 458  | 2 923         | 8             | 249           | 16           | 4    | 20   | 452  | 26   | 20    | 340  |
| Donor C (T0) | 1 856   | 5 478  | 446     | 20    | 352    | 653           | 32            | 232           | 4            | 33   | 8    | 43   | 0    | 57    | 20   |
| Donor D (T0) | 1 299   | 2 159  | 333     | 0     | 54     | 212           | 0             | 93            | 0            | 0    | 0    | 0    | 0    | 5     | 0    |
| Donor E (T0) | 1 991   | 16 856 | 171     | 13    | 168    | 1 501         | 62            | 1 152         | 60           | 41   | 22   | 0    | 41   | 179   | 153  |
| Donor F (T0) | 2 139   | 5 725  | 572     | 30    | 94     | 977           | 9             | 243           | 9            | 0    | 22   | 0    | 9    | 28    | 54   |
| Donor G (T0) | 1 045   | 2 622  | 39      | 61    | 241    | 452           | 7             | 75            | 0            | 0    | 0    | 84   | 0    | 0     | 121  |
| Donor H (T0) | 1 570   | 9 058  | 98      | 21    | 0      | 0             | 22            | 1 025         | 0            | 0    | 0    | 0    | 0    | 0     | 0    |
| Donor A (T2) | 500 000 | 43 791 | 262     | 9     | 0      | 0             | 0             | 82            | 803          | 0    | 0    | 0    | 0    | 310   | 0    |
| Donor B (T2) | 13 092  | 27 242 | 524     | 32    | 546    | 655           | 15            | 182           | 528          | 0    | 6    | 38   | 0    | 2 296 | 70   |
| Donor C (T2) | 13 200  | 42 284 | 517     | 41    | 344    | 449           | 5             | 203           | 120          | 0    | 6    | 22   | 0    | 862   | 54   |
| Donor D (T2) | 21 536  | 37 966 | 125     | 15    | 147    | 423           | 27            | 878           | 25           | 0    | 10   | 0    | 8    | 482   | 68   |
| Donor E (T2) | 12 162  | 83 229 | 431     | 45    | 1 296  | 3 232         | 7             | 297           | 219          | 4    | 22   | 545  | 28   | 1 297 | 330  |
| Donor F (T2) | 11 199  | 30 335 | 671     | 31    | 232    | 1 041         | 3             | 275           | 145          | 0    | 25   | 0    | 9    | 324   | 102  |
| Donor G (T2) | 14 682  | 85 093 | 98      | 26    | 399    | 518           | 4             | 93            | 79           | 4    | 0    | 100  | 0    | 105   | 83   |
| Donor H (T2) | 16 528  | 54 127 | 142     | 31    | 356    | 0             | 18            | 624           | 42           | 0    | 0    | 0    | 0    | 116   | 18   |

| IL-8  | IL-10 | IL-12p40 | IL-12p70 | IL-13 | IL-15 | IL-17 | IP-10 | MCP-1 | MIP-1 $\alpha$ | MIP-1 $\beta$ | TNF- $\alpha$ | TNF- $\beta$ |
|-------|-------|----------|----------|-------|-------|-------|-------|-------|----------------|---------------|---------------|--------------|
| 5     | 0     | 0        | 0        | 0     | 12    | 0     | 339   | 295   | 30             | 179           | 5             | 0            |
| 58    | 165   | 419      | 0        | 38    | 13    | 10    | 372   | 484   | 96             | 92            | 8             | 19           |
| 18    | 19    | 105      | 13       | 19    | 5     | 33    | 358   | 372   | 246            | 371           | 4             | 4            |
| 3     | 4     | 0        | 0        | 0     | 0     | 0     | 336   | 306   | 0              | 43            | 0             | 0            |
| 31    | 115   | 2 035    | 31       | 238   | 68    | 50    | 2 056 | 312   | 210            | 239           | 5             | 134          |
| 16    | 26    | 554      | 6        | 53    | 13    | 12    | 223   | 238   | 103            | 90            | 4             | 20           |
| 8     | 10    | 40       | 0        | 0     | 3     | 10    | 240   | 156   | 51             | 61            | 0             | 0            |
| 4     | 0     | 51       | 59       | 0     | 0     | 20    | 69    | 225   | 55             | 278           | 4             | 0            |
| 737   | 0     | 0        | 0        | 0     | 0     | 0     | 237   | 530   | 888            | 0             | 294           | 0            |
| 2 411 | 19    | 120      | 5        | 6     | 5     | 9     | 373   | 512   | 5 406          | 3 864         | 1 969         | 4            |
| 2 296 | 12    | 217      | 5        | 14    | 5     | 3     | 363   | 552   | 4 802          | 2 234         | 1 281         | 5            |
| 401   | 40    | 508      | 0        | 66    | 11    | 13    | 3 085 | 369   | 1 183          | 296           | 390           | 33           |
| 2 704 | 185   | 481      | 0        | 43    | 14    | 6     | 415   | 790   | 2 399          | 1 259         | 2 067         | 21           |
| 2 657 | 30    | 530      | 0        | 46    | 13    | 0     | 238   | 458   | 4 913          | 1 546         | 1 740         | 25           |
| 2 631 | 13    | 46       | 0        | 0     | 4     | 3     | 259   | 171   | 3 931          | 1 091         | 897           | 0            |
| 2 744 | 4     | 60       | 23       | 0     | 3     | 16    | 53    | 425   | 3 468          | 278           | 1 765         | 0            |
