# Supplementary material for: Identification of an Unusual Pattern of Global Gene Expression in Group B Streptococcus Grown in Human Blood
Source: PubMed Central journal article supplement (PMC2745576; doi:10.1371/journal.pone.0007145), 2009-09-23
Supplement: pone.0007145.s002.pdf [file pone.0007145.s002.pdf]

| NCBI ID | COG(s)       | Locus   | Gene   | Functional category      | Subcategory                                                                     | Putative function                                                                 | A vs 7d (T1) | A | B | C | D | E   | F | G | H     | A vs 7d (T2) | A | B | C | D | E | F | G | H |   |
|---------|--------------|---------|--------|--------------------------|---------------------------------------------------------------------------------|-----------------------------------------------------------------------------------|--------------|---|---|---|---|-----|---|---|-------|--------------|---|---|---|---|---|---|---|---|---|
| 1029804 | COG0593L     | gbs0001 | dnaA   | Cellular processes       | DNA replication, recombination and repair                                       | Chromosomal replication initiator protein dnaA                                    | 2,315        | P | P | P | P | P   | P | P | P     | 1,780        | P | P | P | P | P | P | P | P |   |
| 1029808 | COG0592L     | gbs0002 | dnaN   | Cellular processes       | DNA replication, recombination and repair                                       | DNA polymerase III, beta chain (EC 2.7.7.7)                                       | 1,806        | P | P | P | P | P   | P | P | P     | 1,579        | P | P | P | P | P | P | P | P |   |
| 1029799 | COG1597IR    | gbs0003 |        | Hypothetical             |                                                                                 | Hypothetical protein                                                              | 2,367        | P | A | P | M | P   | P | M | A     | 1,517        | P | A | A | M | A | A | A | A |   |
| 1029797 | -            | gbs0004 |        | Hypothetical             |                                                                                 | Hypothetical cytosolic protein                                                    | 2,072        | P | A | A | A | A   | A | A | A     | 2,088        | P | A | A | A | A | A | A | A |   |
| 1029795 | -            | gbs0005 |        | Hypothetical             |                                                                                 | Hypothetical protein                                                              | 2,043        | P | P | P | P | P   | P | P | P     | 1,930        | P | A | P | P | A | P | A | P |   |
| 1030675 | COG0012J     | gbs0006 | ychF   | Cellular processes       | Translation, ribosomal structure and biogenesis                                 | GTP-binding protein, probable translation factor                                  | 1,744        | P | P | P | P | P   | P | P | P     | 0,759        | P | P | P | P | P | P | P | P |   |
| 1030987 | -            | gbs0007 | pth    | Cellular processes       | Translation, ribosomal structure and biogenesis                                 | Peptidyl-tRNA hydrolase (EC 3.1.1.29)                                             | 7,592        | M | A | A | A | A   | A | A | A     | 0,205        | A | A | A | A | A | A | A | A | A |
| 1029794 | COG1197LK    | gbs0008 | trcF   | Cellular processes       | DNA replication, recombination and repair                                       | Transcription-repair coupling factor                                              | 5,373        | A | A | A | A | A   | A | A | A     | 0,675        | A | A | A | A | A | A | A | A | A |
| 1029790 | COG1188J     | gbs0009 | HSP15  | Cellular processes       | Translation, ribosomal structure and biogenesis                                 | Heat shock protein 15                                                             | 1,616        | P | P | P | P | P   | P | P | P     | 1,256        | P | A | M | A | A | A | A | A |   |
| 1029787 | COG2919D     | gbs0010 | divIC  | Cellular processes       | Cell division                                                                   | Cell division protein DIVIC                                                       | 1,876        | P | P | P | A | P   | P | P | P     | 0,885        | P | A | P | P | P | P | A | P |   |
| 1030424 | -            | gbs0011 |        | Hypothetical             |                                                                                 | Hypothetical protein                                                              | 3,462        | P | P | P | P | P   | P | P | P     | 1,608        | P | A | P | A | P | P | A | P |   |
| 1029782 | COG2367V     | gbs0012 |        | Cellular processes       | Toxin production and resistance                                                 | Beta-lactamase (EC 3.5.2.6)                                                       | 2,410        | P | P | P | M | P   | P | P | P     | 0,890        | P | A | A | A | A | P | P | A |   |
| 1029802 | COG0037D     | gbs0013 | tiIS   | Cellular processes       | Translation, ribosomal structure and biogenesis                                 | tRNA(Ile)-lysine synthetase TiIS                                                  | 2,234        | P | A | P | A | P   | P | A | A     | 0,662        | P | A | P | A | A | P | M | A |   |
| 1030991 | COG0634F     | gbs0014 | hpt    | Metabolism and transport | Purines, pyrimidines, nucleosides, and nucleotides                              | Purine, pyrimidine, nucleoside, and nucleotide                                    | 1,717        | P | P | P | P | P   | P | P | 1,275 | P            | A | P | P | P | P | P | P | P |   |
| 1030977 | COG0465O     | gbs0015 | ftsH   | Cellular processes       | Posttranslational modification, protein turnover, chaperones                    | Cell division protein ftsH (EC 3.4.24.-)                                          | 1,549        | P | P | P | P | P   | P | P | 1,524 | P            | A | P | A | P | P | P | P | P |   |
| 1031481 | 3883S, COG3  | gbs0016 | pcsB   | Cell Envelope            | Other                                                                           | Glucan-binding protein B                                                          | 1,454        | P | P | P | P | P   | P | P | 0,773 | P            | P | P | P | P | P | P | P | P |   |
| 1031120 | COG0462FE    | gbs0017 | prsA.2 | Metabolism and transport | Purines, pyrimidines, nucleosides, and nucleotides                              | Ribose-phosphate pyrophosphokinase (EC 2.7.6.1)                                   | 2,160        | P | P | P | P | P   | P | P | 1,270 | P            | P | P | P | P | P | P | P | P |   |
| 1031047 | COG0436E     | gbs0018 | aspB   | Metabolism and transport | Amino acids, peptides, aminosugars and amines                                   | Aromatic amino acid aminotransferase (EC 2.6.1.57) Acetylglutamate amin           | 1,417        | P | P | P | P | P   | P | P | 1,684 | P            | A | P | M | P | P | P | P | P |   |
| 1030999 | COG1381L     | gbs0019 | recO   | Cellular processes       | DNA replication, recombination and repair                                       | DNA repair protein recO                                                           | 2,436        | P | P | P | P | P   | P | P | 1,477 | P            | A | P | M | M | P | P | P | P |   |
| 1031000 | -            | gbs0020 |        | Cellular processes       | Posttranslational modification, protein turnover, chaperones                    | CAAX amino terminal protease family                                               | 0,248        | A | A | A | A | A   | A | A | P     | 0,145        | A | P | A | A | A | A | A | A |   |
| 1031476 | COG0416I     | gbs0021 | plsX   | Metabolism and transport | Fatty acid and phospholipids                                                    | Fatty acid phospholipid synthesis protein plsX                                    | 2,831        | P | P | P | P | P   | P | P | 1,619 | P            | A | P | P | P | P | A | P | A |   |
| 1031477 | COG0236IQ    | gbs0022 | acpP.2 | Metabolism and transport | Fatty acid and phospholipids                                                    | Acyl carrier protein                                                              | 2,238        | P | P | P | P | P   | P | P | 1,257 | P            | A | P | A | A | P | P | A | P |   |
| 1031217 | -            | gbs0023 | purC   | Metabolism and transport | Purines, pyrimidines, nucleosides, and nucleotides                              | Phosphoribosylaminoimidazole-succinocarboxamide synthase (EC 6.3.2.6)             | 1,620        | P | P | P | P | P   | P | P | 0,476 | A            | A | A | A | P | A | P | A | P |   |
| 1030849 | 30046F, COG0 | gbs0024 |        | Metabolism and transport | Purines, pyrimidines, nucleosides, and nucleotides                              | Phosphoribosylformylglycinamide synthase (EC 6.3.5.3)                             | 0,995        | P | P | P | P | P   | P | P | 0,619 | P            | P | P | P | P | P | M | P | P |   |
| 1031315 | COG0034F     | gbs0025 | purF   | Metabolism and transport | Purines, pyrimidines, nucleosides, and nucleotides                              | Amidophosphoribosyltransferase (EC 2.4.2.14)                                      | 1,502        | P | P | P | P | P   | P | P | 1,845 | P            | A | A | A | P | A | P | A | P |   |
| 1029830 | COG0150F     | gbs0026 | purM   | Metabolism and transport | Purines, pyrimidines, nucleosides, and nucleotides                              | Phosphoribosylformylglycinamide cyclo-ligase (EC 6.3.3.1)                         | 0,989        | P | P | P | P | P   | P | P | 0,845 | P            | M | P | P | P | P | P | P | P |   |
| 1030771 | -            | gbs0027 | purN   | Metabolism and transport | Purines, pyrimidines, nucleosides, and nucleotides                              | Phosphoribosylglycinamide formyltransferase (EC 2.1.2.2)                          | 1,741        | P | M | P | P | P   | P | P | 2,252 | P            | A | A | A | A | A | A | A | A |   |
| 1031482 | -            | gbs0028 |        | Hypothetical             |                                                                                 | Zwittermucin A resistance protein zmaR                                            | 1,920        | P | P | P | P | P   | P | P | 3,580 | P            | M | A | A | P | A | P | A | A |   |
| 1031413 | -            | gbs0029 | purH   | Metabolism and transport | Purines, pyrimidines, nucleosides, and nucleotides                              | Phosphoribosylaminoimidazolecarboxamide formyltransferase (EC 2.1.2.3) IMP c      | 1,145        | P | P | P | P | P   | P | P | 1,761 | P            | A | P | A | P | P | P | P | P |   |
| 1031034 | COG0739M     | gbs0030 |        | Cellular processes       | Posttranslational modification, protein turnover, chaperones                    | Peptidoglycan-specific endopeptidase, M23 family                                  | 1,373        | P | A | A | A | A   | A | A | 0,083 | A            | A | A | A | A | A | A | A | A |   |
| 1031483 | -            | gbs0031 | slp    | Hypothetical             |                                                                                 | Surface antigen                                                                   | 1,099        | P | P | P | P | P   | P | P | 0,853 | P            | P | P | P | P | P | P | P | P |   |
| 1029831 | COG3010G     | gbs0032 |        | Metabolism and transport | Carbohydrates, organic alcohols, and acids                                      | N-acetylmannosamine-6-phosphate 2-epimerase (EC 5.1.3.9)                          | 0,612        | P | A | P | A | A   | A | A | A     | 8,317        | P | P | P | P | P | P | P | P |   |
| 1030981 | COG1653G     | gbs0033 |        | Metabolism and transport | Carbohydrates, organic alcohols, and acids                                      | N-acetylneuraminate-binding protein                                               | 0,803        | A | A | A | A | A   | A | A | A     | 7,517        | P | A | P | A | P | M | A | A |   |
| 1029979 | COG1175G     | gbs0034 |        | Metabolism and transport | Carbohydrates, organic alcohols, and acids                                      | N-acetylneuraminate transport system permease protein                             | 0,658        | A | A | A | A | A   | A | A | A     | 7,252        | P | A | M | A | A | A | A | A |   |
| 1031470 | COG0395G     | gbs0035 |        | Metabolism and transport | Carbohydrates, organic alcohols, and acids                                      | N-acetylneuraminate transport system permease protein                             | 0,176        | A | A | A | A | A   | A | A | A     | 4,372        | P | A | P | A | A | A | A | A |   |
| 1031485 | -            | gbs0036 |        | Hypothetical             |                                                                                 | Hypothetical cytosolic protein                                                    | 0,420        | A | A | M | A | A   | A | A | A     | 4,450        | P | A | P | A | P | P | A | A |   |
| 1031486 | -            | gbs0037 |        | Hypothetical             |                                                                                 | Hypothetical membrane spanning protein                                            | 2,058        | A | A | A | A | A   | A | A | A     | 2,842        | P | A | P | A | A | P | A | A |   |
| 1030355 | COG0329EM    | gbs0038 | nanH   | Cell Envelope            | Biosynthesis and degradation of surface polysaccharides and lipopolysaccharides | N-acetylneuraminate lyase (EC 4.1.3.3)                                            | 0,243        | A | A | A | A | A   | A | A | A     | 3,891        | P | A | A | A | A | A | A | A |   |
| 1030984 | COG1940KG    | gbs0039 |        | Cellular processes       | Signal transduction                                                             | N-acetylmannosamine kinase (EC 2.7.1.60) Transcriptional regulator                | 0,727        | A | A | A | A | A   | A | A | A     | 1,828        | P | A | A | A | A | A | A | A |   |
| 1031495 | COG3458Q     | gbs0040 |        | Metabolism and transport | Secondary metabolites                                                           | Cephalosporin-C deacetylase (EC 3.1.1.41)                                         | 0,658        | A | A | A | A | A   | A | A | A     | 1,542        | P | A | M | A | A | A | A | A |   |
| 1030478 | COG1737K     | gbs0041 |        | Cellular processes       | Transcription                                                                   | Transcriptional regulator, RpiR family                                            | 2,221        | P | P | P | P | P   | P | P | 1,641 | P            | P | P | P | P | P | P | P | P |   |
| 1031720 | COG00151F    | gbs0042 | purD   | Metabolism and transport | Purines, pyrimidines, nucleosides, and nucleotides                              | Phosphoribosylamine-glycine ligase (EC 6.3.4.13)                                  | 0,535        | P | P | P | P | P   | P | P | 0,302 | A            | A | M | A | A | M | P | A | P |   |
| 1030779 | COG0041F     | gbs0043 | purE   | Metabolism and transport | Purines, pyrimidines, nucleosides, and nucleotides                              | Phosphoribosylaminoimidazole carboxylase carboxyltransferase subunit (EC 4.1.1.1) | 0,670        | P | P | P | P | P   | P | P | 0,495 | P            | A | A | A | A | P | M | M | A |   |
| 1030263 | COG0026F     | gbs0044 | purK   | Metabolism and transport | Purines, pyrimidines, nucleosides, and nucleotides                              | Phosphoribosylaminoimidazole carboxylase NCAIR mutase subunit (EC 4.1.1.21)       | 0,611        | P | P | P | P | P   | P | P | 0,561 | P            | A | M | A | A | P | M | A | A |   |
| 1030998 | -            | gbs0045 |        | Hypothetical             |                                                                                 | Hypothetical protein                                                              | 0,847        | P | P | P | P | P   | P | P | 1,526 | P            | P | P | P | P | P | P | P | P |   |
| 1030996 | -            | gbs0046 |        | Hypothetical             |                                                                                 | Hypothetical protein                                                              | 0,869        | P | P | P | P | P   | P | P | 1,559 | P            | P | P | P | P | P | P | P | P |   |
| 1030994 | COG0015F     | gbs0047 | purB   | Metabolism and transport | Purines, pyrimidines, nucleosides, and nucleotides                              | Adenylosuccinate lyase (EC 4.3.2.2)                                               | 0,787        | P | P | P | P | P   | P | P | 0,945 | P            | P | P | P | P | P | P | P | P |   |
| 1030979 | -            | gbs0048 |        | Cellular processes       | Transcription                                                                   | Transcriptional regulator                                                         | 1,625        | P | P | P | P | P   | P | P | 1,978 | P            | A | P | P | P | P | A | M | A |   |
| 1030989 | COG2255L     | gbs0049 | ruvB   | Cellular processes       | DNA replication, recombination and repair                                       | Holliday junction DNA helicase ruvB                                               | 1,175        | P | A | A | A | A   | A | A | A     | 0,847        | P | A | A | A | A | A | A | A |   |
| 1030982 | COG0394T     | gbs0050 |        | Cellular processes       | Signal transduction                                                             | Protein tyrosine phosphatase (EC 3.1.3.48)                                        | 0,940        | P | P | P | P | P   | P | P | 1,256 | P            | P | P | P | P | P | P | M | A |   |
| 1030978 | COG4642S     | gbs0051 |        | Hypothetical             |                                                                                 | Hypothetical membrane associated protein                                          | 1,199        | P | P | P | P | P   | P | P | 2,411 | P            | A | P | A | M | A | A | A | A |   |
| 1030985 | COG1835I     | gbs0052 |        | Metabolism and transport | Fatty acid and phospholipids                                                    | Acyltransferase family                                                            | 1,648        | P | P | P | P | P   | P | P | 1,596 | P            | P | P | P | P | P | P | P | P |   |
| 1030824 | 1012C, COG1  | gbs0053 | adh2   | Metabolism and transport | Energy production and conversion                                                | Alcohol dehydrogenase (EC 1.1.1.1) Acetaldehyde dehydrogenase [acetylating] (     | 0,660        | P | A | A | P | P   | P | A | 0,346 | P            | P | A | P | P | A | P | A | P |   |
| 1030992 | COG1064R     | gbs0054 | adhA   | Metabolism and transport | Energy production and conversion                                                | Alcohol dehydrogenase (EC 1.1.1.1)                                                | 0,360        | P | A | P | M | P   | P | P | 0,530 | P            | P | P | P | P | P | P | P | P |   |
| 1031381 | COG0498E     | gbs0055 | thrC   | Metabolism and transport | Amino acids, peptides, aminosugars and amines                                   | Threonine synthase (EC 4.2.3.1)                                                   | 2,542        | P | A | P | A | M   | A | M | 1,673 | P            | A | A | A | A | A | A | A | A |   |
| 1030757 | COG0534V     | gbs0056 |        | Cellular processes       | Toxin production and resistance                                                 | Na+ driven multidrug efflux pump                                                  | 1,777        | P | M | P | P | P   | P | P | 0,628 | P            | P | P | P | P | P | P | P | P |   |
| 1030755 | COG0051J     | gbs0057 | rpsJ   | Cellular processes       | Translation, ribosomal structure and biogenesis                                 | SSU ribosomal protein S10P                                                        | 1,241        | P | P | P | P | P   | P | P | 0,682 | P            | P | A | P | P | P | P | P | P |   |
| 1030743 | -            | gbs0058 | rplC   | Cellular processes       | Translation, ribosomal structure and biogenesis                                 | LSU ribosomal protein L3P                                                         | 1,038        | P | P | P | P | P</ |   |   |       |              |   |   |   |   |   |   |   |   |   |





|         |              |         |           |                                 |                                                                   |                                                                               |       |   |   |   |   |   |   |   |   |       |   |   |   |   |   |   |   |   |   |
|---------|--------------|---------|-----------|---------------------------------|-------------------------------------------------------------------|-------------------------------------------------------------------------------|-------|---|---|---|---|---|---|---|---|-------|---|---|---|---|---|---|---|---|---|
| 1031238 | COG0171H     | gbs0286 | nadE      | Metabolism and transport        | Cofactors, prosthetic groups, and carriers                        | NH(3)-dependent NAD(+) synthetase (EC 6.3.5.1)                                | 1.103 | P | P | P | A | P | P | M | P | 0.952 | P | A | A | A | A | A | A | A | A |
| 1030350 | COG3579E     | gbs0287 | pepC      | Metabolism and transport        | Amino acids, peptides, aminoglycos and amines                     | Aminopeptidase C (EC 3.4.22.40)                                               | 1.003 | P | P | P | P | P | P | P | P | 1.586 | P | P | P | P | P | P | P | P | P |
| 1031240 | COG0744M     | gbs0288 | ponA      | Cell Envelope                   | Biosynthesis and degradation of murein sacculus and peptidoglycan | Multimodular transpeptidase-transglycosylase PBP 1A                           | 1.637 | P | P | P | P | P | P | P | P | 1.433 | P | P | P | P | P | P | P | P | P |
| 1031247 | COG3331R     | gbs0289 | recU      | Cellular processes              | DNA replication, recombination, and repair                        | Recombination protein recU                                                    | 3.435 | P | P | P | P | P | P | P | P | 1.589 | P | P | P | P | P | P | P | P | P |
| 1031242 | -            | gbs0290 | -         | Hypothetical                    | Hypothetical cytosolic protein                                    | Hypothetical cytosolic protein                                                | 0.717 | P | A | A | A | A | A | A | A | 0.415 | P | A | A | A | A | A | A | A | A |
| 1030697 | COG3599D     | gbs0291 | -         | Cellular processes              | Cell division                                                     | Cell division initiation protein DivIVA                                       | 2.054 | P | P | P | P | P | P | P | P | 1.033 | P | P | P | P | P | P | P | P | P |
| 1031245 | COG0116L     | gbs0292 | -         | Metabolism and transport        | Central intermediary metabolism                                   | Methyltransferase (EC 2.1.1.-)                                                | 1.681 | P | A | P | A | A | P | A | A | 0.634 | P | A | M | A | A | M | A | A | A |
| 1031248 | -            | gbs0293 | -         | Hypothetical                    | Hypothetical protein                                              | Hypothetical protein                                                          | 1.533 | P | P | P | P | P | P | P | P | 0.905 | P | M | P | P | P | P | P | P | P |
| 1030700 | -            | gbs0294 | luxS      | Cellular processes              | Signal transduction                                               | Autoinducer-2 production protein luxS (EC 3.13.1.-)                           | 1.546 | P | P | P | P | P | P | P | P | 1.986 | P | A | P | A | M | P | A | A | A |
| 1031251 | COG1418R     | gbs0295 | -         | Metabolism and transport        | Central intermediary metabolism                                   | Hydrolase (HAD superfamily)                                                   | 2.209 | P | P | P | A | P | P | P | P | 0.888 | P | P | A | A | P | P | P | P | P |
| 1031256 | COG1131V     | gbs0296 | -         | Transport and binding proteins  | Unknown substrate                                                 | ABC transporter ATP-binding protein                                           | 1.658 | P | A | M | A | P | A | A | A | 1.098 | A | A | A | A | A | A | A | A | A |
| 1031254 | COG0842V     | gbs0297 | -         | Transport and binding proteins  | Unknown substrate                                                 | ABC transporter permease                                                      | 0.820 | M | A | A | A | A | A | A | A | 0.925 | A | A | A | A | A | A | A | A | A |
| 1031261 | COG4585T     | gbs0298 | -         | Cellular processes              | Signal transduction                                               | Sensory Transduction Histidine Kinase (EC 2.7.3.-)                            | 1.526 | P | A | P | P | P | P | A | A | 0.618 | P | A | P | A | M | P | A | A | A |
| 1030718 | COG2197TK    | gbs0299 | -         | Cellular processes              | Signal transduction                                               | Two-component response regulator                                              | 1.662 | P | A | P | A | P | P | P | A | 0.832 | P | A | A | A | A | A | A | A | A |
| 1030702 | -            | gbs0300 | -         | Hypothetical                    | Hypothetical membrane spanning protein                            | Hypothetical membrane spanning protein                                        | 1.181 | P | A | P | P | P | P | A | P | 0.475 | P | A | A | M | P | A | A | A | A |
| 1031266 | COG0194F     | gbs0301 | gmk       | Metabolism and transport        | Purines, pyrimidines, nucleosides, and nucleotides                | Guanylate kinase (EC 2.7.4.8)                                                 | 3.205 | P | P | P | P | P | P | P | P | 1.719 | P | P | P | P | P | P | P | P | P |
| 1031267 | COG1758K     | gbs0302 | -         | Cellular processes              | Transcription                                                     | DNA-directed RNA polymerase omega chain (EC 2.7.7.6)                          | 1.401 | P | P | P | A | P | P | P | P | 1.198 | P | A | P | A | P | P | P | P | P |
| 1031268 | COG1198L     | gbs0303 | priA      | Cellular processes              | DNA replication, recombination and repair                         | Primosomal protein N                                                          | 2.221 | P | A | P | A | A | A | A | A | 1.957 | A | A | A | A | A | A | A | A | A |
| 1031270 | COG0223J     | gbs0304 | fnt       | Cellular processes              | Translation, ribosomal structure and biogenesis                   | Methionyl-tRNA formyltransferase (EC 2.1.2.9)                                 | 0.881 | P | P | P | P | P | P | P | P | 0.798 | P | A | M | P | P | A | A | A | A |
| 1030722 | COG0144J     | gbs0305 | sunL      | Cellular processes              | Translation, ribosomal structure and biogenesis                   | 16S rRNA m(5)C 967 methyltransferase (EC 2.1.1.-)                             | 1.546 | P | P | P | M | P | P | P | P | 1.268 | P | M | P | A | M | P | A | A | A |
| 1031295 | COG0631T     | gbs0306 | stp1/pppI | Cellular processes              | Signal transduction                                               | Protein phosphatase 2C (EC 3.1.3.16)                                          | 1.962 | P | P | P | P | P | P | P | P | 1.268 | P | P | P | P | P | P | P | P | P |
| 1030725 | 15fRRTL, COC | gbs0307 | stk1      | Cellular processes              | Signal transduction                                               | Serine threonine protein kinase (EC 2.7.1.37)                                 | 1.945 | P | P | P | P | P | P | P | P | 1.330 | P | P | P | P | P | P | P | P | P |
| 1030188 | COG4758S     | gbs0308 | yyvF      | Transport and binding proteins  | Unknown substrate                                                 | Transporter yyvF                                                              | 1.493 | P | A | P | A | P | P | A | A | 1.062 | P | A | P | M | P | A | P | A | A |
| 1031297 | COG4585T     | gbs0309 | yyvE      | Cellular processes              | Signal transduction                                               | Two-component sensor protein yyvE (EC 2.7.3.-)                                | 3.980 | P | A | A | A | A | A | A | A | 1.893 | P | A | A | A | A | A | A | A | A |
| 1031299 | COG2197TK    | gbs0310 | yyvC      | Cellular processes              | Signal transduction                                               | Two-component response regulator yyvC                                         | 1.016 | P | A | P | M | P | P | P | P | 0.866 | P | A | P | A | A | P | P | A | A |
| 1031439 | 0561R, COGO  | gbs0311 | -         | Metabolism and transport        | Central intermediary metabolism                                   | Peptidyl-prolyl cis-trans isomerase (EC 5.2.1.8)                              | 1.665 | P | P | P | P | P | P | P | P | 0.792 | P | P | P | P | P | P | P | P | P |
| 1030520 | COG1098J     | gbs0312 | -         | Cellular processes              | Translation, ribosomal structure and biogenesis                   | S1-type RNA-binding domain                                                    | 1.689 | P | P | P | P | P | P | P | P | 0.827 | P | A | P | A | P | P | A | A | A |
| 1030470 | COG1180O     | gbs0313 | -         | Metabolism and transport        | Energy production and conversion                                  | Pyruvate formate-lyase activating enzyme (EC 1.97.1.4)                        | 0.051 | P | P | P | P | P | P | P | P | 0.572 | P | P | P | P | P | P | P | P | P |
| 1031443 | COG1349KG    | gbs0314 | -         | Cellular processes              | Transcription                                                     | Transcriptional regulator, DeoR family                                        | 0.723 | P | P | P | P | P | P | P | P | 1.389 | P | A | P | A | P | P | P | P | P |
| 1031449 | COG2390K     | gbs0315 | -         | Cellular processes              | Transcription                                                     | Transcriptional regulatory protein                                            | 1.235 | P | P | P | P | P | P | P | P | 1.706 | P | P | P | A | M | P | A | P | P |
| 1031313 | -            | gbs0316 | -         | Metabolism and transport        | Carbohydrates, organic alcohols, and acids                        | PTS system, cellobiose-specific IIA component (EC 2.7.1.69)                   | 0.429 | P | P | P | P | P | P | P | P | 0.922 | P | A | P | A | M | A | P | A | A |
| 1031316 | COG1440G     | gbs0317 | -         | Metabolism and transport        | Carbohydrates, organic alcohols, and acids                        | PTS system, cellobiose-specific IIB component (EC 2.7.1.69)                   | 0.315 | P | M | P | P | P | P | P | A | 0.759 | P | A | A | A | A | A | A | A | A |
| 1030527 | COG1455G     | gbs0318 | -         | Metabolism and transport        | Carbohydrates, organic alcohols, and acids                        | PTS system, cellobiose-specific IIC component (EC 2.7.1.69)                   | 0.240 | A | A | A | A | A | A | A | A | 0.361 | A | A | A | A | A | A | A | A | A |
| 1030546 | COG1882C     | gbs0319 | pflD      | Metabolism and transport        | Energy production and conversion                                  | Formate acetyltransferase (EC 2.3.1.54)                                       | 0.102 | P | P | P | P | P | P | P | P | 0.245 | P | P | P | P | P | P | P | P | P |
| 1031318 | -            | gbs0320 | mipB      | Metabolism and transport        | Energy production and conversion                                  | Transaldolase (EC 2.2.1.2)                                                    | 0.039 | A | A | P | P | P | P | A | P | 0.219 | P | P | P | P | P | P | P | P | P |
| 1030547 | COG0371C     | gbs0321 | gldA      | Metabolism and transport        | Energy production and conversion                                  | Glycerol dehydrogenase (EC 1.1.1.6)                                           | 0.172 | A | P | P | P | P | P | A | P | 0.237 | P | P | P | P | P | P | P | P | P |
| 1031319 | COG0031E     | gbs0322 | cysK      | Metabolism and transport        | Amino acids, peptides, aminoglycos and amines                     | Cysteine synthase (EC 2.5.1.47)                                               | 1.487 | P | P | M | P | P | P | A | A | 0.923 | P | A | A | A | P | M | P | A | A |
| 1030550 | COG1739S     | gbs0323 | -         | Hypothetical                    | Hypothetical protein                                              | Hypothetical protein                                                          | 5.515 | P | A | A | A | A | A | A | A | 0.750 | A | A | A | A | A | A | A | A | A |
| 1031416 | COG4098L     | gbs0324 | comFA     | Cellular processes              | DNA transformation                                                | COMF operon protein 1                                                         | 0.100 | A | A | A | A | A | A | A | A | 0.035 | A | A | A | A | A | A | A | A | A |
| 1031320 | COG1040R     | gbs0325 | comFC     | General function predicted only | General function predicted only                                   | COMF operon protein 3                                                         | 0.445 | A | A | A | A | M | A | A | A | 0.387 | P | A | A | A | A | A | A | A | A |
| 1030561 | COG1544J     | gbs0326 | -         | Cellular processes              | Translation, ribosomal structure and biogenesis                   | Ribosome-associated factor Y                                                  | 0.241 | P | P | P | P | P | P | P | P | 0.281 | P | P | P | P | P | P | P | P | P |
| 1031329 | COG0527E     | gbs0327 | lysC      | Metabolism and transport        | Amino acids, peptides, aminoglycos and amines                     | Aspartokinase (EC 2.7.2.4)                                                    | 2.125 | P | A | A | A | A | A | A | A | 0.625 | M | A | A | A | A | A | A | A | A |
| 1031799 | COG0637R     | gbs0328 | -         | Metabolism and transport        | Carbohydrates, organic alcohols, and acids                        | Beta-phosphoglucomutase (EC 5.4.2.6)                                          | 3.166 | P | P | P | P | P | A | A | P | 1.223 | P | A | A | P | A | A | A | A | A |
| 1031330 | COG1024I     | gbs0329 | phaB      | Metabolism and transport        | Fatty acid and phospholipids                                      | Enoyl-CoA hydratase (EC 4.2.1.17)                                             | 1.164 | P | P | P | P | P | P | P | P | 0.454 | P | P | P | A | A | P | P | P | P |
| 1031333 | COG1846K     | gbs0330 | -         | Cellular processes              | Transcription                                                     | Transcriptional regulator, MarR family                                        | 1.606 | P | P | P | P | P | P | P | P | 1.056 | P | P | P | P | P | P | P | P | P |
| 1030728 | COG0332I     | gbs0331 | fabH      | Metabolism and transport        | Fatty acid and phospholipids                                      | 3-oxoacyl-[acyl-carrier-protein] synthase III (EC 2.3.1.41)                   | 1.472 | P | P | P | P | P | P | P | P | 1.011 | P | P | P | P | P | P | P | P | P |
| 1031336 | COG0236IQ    | gbs0332 | acpP      | Metabolism and transport        | Fatty acid and phospholipids                                      | Acyl carrier protein                                                          | 1.155 | P | P | P | P | P | P | P | P | 1.172 | P | P | P | P | P | P | P | P | P |
| 1031832 | COG2070R     | gbs0333 | fabK      | Metabolism and transport        | Fatty acid and phospholipids                                      | Enoyl-[acyl-carrier protein] reductase (NADH) (EC 1.3.1.9)                    | 1.698 | P | P | P | P | P | P | P | P | 1.188 | P | A | P | P | A | P | P | P | P |
| 1031797 | COG0331I     | gbs0334 | fabD      | Metabolism and transport        | Fatty acid and phospholipids                                      | Malonyl-CoA-[acyl-carrier-protein] transacylase (EC 2.3.1.39)                 | 1.715 | P | A | P | P | M | P | P | P | 1.157 | P | A | P | A | A | M | P | A | A |
| 1030587 | COG1028IQR   | gbs0335 | fabG      | Metabolism and transport        | Fatty acid and phospholipids                                      | 3-oxoacyl-[acyl-carrier protein] reductase (EC 1.1.1.100)                     | 1.878 | P | A | P | P | P | P | P | P | 0.893 | P | A | P | A | P | P | P | P | P |
| 1031339 | COG0304IQ    | gbs0336 | fabF      | Metabolism and transport        | Fatty acid and phospholipids                                      | 3-oxoacyl-[acyl-carrier-protein] synthase (EC 2.3.1.41)                       | 1.599 | P | A | P | P | P | P | P | P | 0.702 | P | P | P | A | P | P | P | P | P |
| 1030727 | COG0511I     | gbs0337 | accB      | Metabolism and transport        | Fatty acid and phospholipids                                      | Biotin carboxyl carrier protein of acetyl-CoA carboxylase (EC 6.4.1.2)        | 1.520 | P | P | P | P | P | P | P | P | 0.824 | P | P | P | P | P | P | P | P | P |
| 1031344 | COG0764I     | gbs0338 | abZ/clpA  | Metabolism and transport        | Fatty acid and phospholipids                                      | (3R)-hydroxyacyl-[acyl carrier protein] dehydratase (EC 4.2.1.60)             | 2.662 | P | P | P | P | P | P | P | P | 0.883 | P | P | P | P | P | P | P | P | P |
| 1030589 | COG0439I     | gbs0339 | accC      | Metabolism and transport        | Fatty acid and phospholipids                                      | Biotin carboxylase (EC 6.3.4.14)                                              | 1.746 | P | A | P | A | A | A | P | A | 0.791 | P | A | P | A | M | P | A | A | A |
| 1031347 | COG0777I     | gbs0340 | accA      | Metabolism and transport        | Fatty acid and phospholipids                                      | Acetyl-coenzyme A carboxylase carboxyl transferase subunit beta (EC 6.4.1.2)  | 1.331 | P | A | P | P | P | P | P | P | 0.806 | P | P | P | P | P | P | P | P | P |
| 1031345 | COG0825I     | gbs0341 | accD      | Metabolism and transport        | Fatty acid and phospholipids                                      | Acetyl-coenzyme A carboxylase carboxyl transferase subunit alpha (EC 6.4.1.2) | 1.456 | P | P | P | P | P | P | P | P | 0.865 | P | P | P | P | P | P | P | P | P |
| 1030828 | -            | gbs0342 | -         | Hypothetical                    | Hypothetical protein                                              | Hypothetical protein                                                          | 0.658 | P | P | P | P | P | P | P | P | 0.872 | P | P | P | P | P | P | P | P | P |
| 1031352 | COG0172J     | gbs0343 | serS      | Cellular processes              | Translation, ribosomal structure and biogenesis                   | Seryl-tRNA synthetase (EC 6.1.1.11)                                           | 0.778 | P | P | P | P | P | P | P | P | 1.000 | P | M | P | A | P | P | M | P | M |
| 1030671 | COG3274S     | gbs0344 | -         | Hypothetical                    | Hypothetical protein                                              | Integral membrane protein                                                     | 2.467 | P | P | P | P | P | P | P | P | 1.002 | P | A | P | P | P | A | P | A | P |
| 1030667 | -            | gbs0345 | manO      | Hypothetical                    | Hypothetical cytosolic protein                                    | Hypothetical cytosolic protein                                                | 1.773 | P | P | P | P | P | P | P | P | 2.578 | P | P | P | P | P | P | P | P | P |
| 1030670 | -            | gbs0346 | manN      | Metabolism and transport        | Carbohydrates, organic alcohols, and acids                        | PTS system, mannose-specific IID component (EC 2.7.1.69)                      | 1.109 | P | P | P | P | P | P | P | P | 2.048 | P | P | P | P | P | P | P | P | P |
| 1030669 | -            | gbs0347 | manM      | Metabolism and transport        | Carbohydrates, organic alcohols, and acids                        | PTS system, mannose-specific IIC component (EC 2.7.1.69)                      | 1.211 | P | P | P | P | P | P | P | P | 2.091 | P | P | P | P | P | P | P | P | P |
| 1030489 | COG2893G     | gbs0348 | manL      | Metabolism and transport        | Carbohydrates, organic alcohols, and acids                        | PTS system, mannose-specific IIB component (EC 2.7.1.69)                      | 0.794 | P | P | P | P | P | P | P | P | 2.068 | P | P | P | P | P | P | P | P | P |
| 1030672 | COG0561R     | gbs0349 | -         | Metabolism and transport        | Central intermediary metabolism                                   | Hydrolase (HAD superfamily)                                                   | 3.961 | P | A | A | A | P | A | A | A | 1.129 | P | A | P | A | M | A | A | A | A |
| 1031417 | -            | gbs0350 | -         | Hypothetical                    | Hypothetical protein                                              | Hypothetical protein                                                          | 1.692 | P | P | A | A | P | P | P | P | 1.243 | P | A | P | A | P | P | A | P | A |





|         |            |         |      |                                      |                                                              |        |   |                                                         |                     |       |   |   |   |   |       |       |       |   |   |   |   |   |   |   |   |   |
|---------|------------|---------|------|--------------------------------------|--------------------------------------------------------------|--------|---|---------------------------------------------------------|---------------------|-------|---|---|---|---|-------|-------|-------|---|---|---|---|---|---|---|---|---|
| 1030880 | -          | gbs0619 |      | Hypothetical                         | Hypothetical protein                                         | 1.055  | A | A                                                       | A                   | A     | A | A | A | A | A     | 0.621 | P     | A | A | A | A | A | A | A | A |   |
| 1031243 | COG2963L   | gbs0621 |      | Mobile and extrachromosomal elements | Transposase                                                  | 3.062  | P | A                                                       | P                   | P     | P | P | P | P | P     | 1.418 | P     | P | P | P | P | P | P | P | P |   |
| 1031262 | -          | gbs0622 |      | Hypothetical                         | Hypothetical protein                                         | 1.078  | P | A                                                       | A                   | A     | A | A | A | A | A     | 0.880 | A     | A | A | A | A | A | A | A | A |   |
| 1031121 | -          | gbs0625 |      | Cellular processes                   | Posttranslational modification, protein turnover, chaperones | 2.020  | P | P                                                       | P                   | P     | P | P | P | P | P     | 1.018 | P     | P | P | P | P | P | P | P | P |   |
| 1030901 | -          | gbs0627 | araC | Cellular processes                   | Transcription                                                | 1.036  | P | P                                                       | P                   | P     | P | P | P | P | P     | 1.023 | P     | P | P | P | P | P | P | P | P |   |
| 1031310 | COG4932M   | gbs0628 |      | Hypothetical                         | IPXtG Hypothetical protein                                   | 0.343  | P | A                                                       | M                   | M     | M | M | M | M | P     | 0.230 | P     | A | P | M | A | P | A | A | A |   |
| 1031068 | COG4932M   | gbs0629 |      | Cellular processes                   | Posttranslational modification, protein turnover, chaperones | 1.063  | A | A                                                       | A                   | A     | A | A | A | A | A     | 0.141 | A     | A | A | A | A | A | A | A | A |   |
| 1031473 | COG3764M   | gbs0630 |      | Cellular processes                   | Posttranslational modification, protein turnover, chaperones | 0.307  | A | A                                                       | A                   | A     | A | A | A | A | A     | 0.079 | A     | A | A | A | A | A | A | A | A |   |
| 1031341 | COG3764M   | gbs0631 |      | Cellular processes                   | Posttranslational modification, protein turnover, chaperones | 0.485  | A | A                                                       | A                   | P     | A | A | A | A | A     | 0.242 | M     | A | A | A | A | A | A | A | A |   |
| 1031148 | COG4932M   | gbs0632 |      | Cell Envelope                        | Other                                                        | 0.097  | A | A                                                       | A                   | A     | A | A | A | A | A     | 0.559 | A     | A | A | A | A | A | A | A | A |   |
| 1030835 | COG4932M   | gbs0636 |      | Metabolism and transport             | Energy production and conversion                             | 0.542  | A | A                                                       | A                   | A     | A | A | A | A | A     | 0.127 | A     | A | A | A | A | A | A | A | A |   |
| 1031305 | -          | gbs0638 |      | Hypothetical                         | Hypothetical protein                                         | 4.509  | P | A                                                       | P                   | P     | P | P | P | P | P     | 2.005 | P     | A | P | A | A | A | A | A | P |   |
| 1031469 | -          | gbs0639 |      | Hypothetical                         | Hypothetical protein                                         | 1.635  | A | A                                                       | A                   | A     | A | A | A | A | A     | 0.064 | A     | A | A | A | A | A | A | A | A |   |
| 1030886 | COG1680V   | gbs0640 |      | Cellular processes                   | Toxin production and resistance                              | 3.279  | P | P                                                       | A                   | A     | P | P | A | M | 0.747 | P     | A     | P | A | A | P | A | A | A | A |   |
| 1030753 | COG4586R   | gbs0641 | drfA | General function predicted only      | Daunorubicin resistance ATP-binding protein drfA             | 2.331  | P | A                                                       | A                   | A     | A | A | A | A | A     | 1.677 | P     | M | P | P | P | P | P | P | P |   |
| 1031475 | COG4587R   | gbs0642 |      | General function predicted only      | Daunorubicin resistance transmembrane protein                | 5.732  | P | A                                                       | A                   | A     | A | A | A | A | A     | 1.768 | P     | A | P | A | A | P | A | P | P |   |
| 1031396 | COG3694R   | gbs0643 |      | Transport and binding proteins       | Unknown substrate                                            | 2.608  | P | A                                                       | A                   | A     | A | A | A | A | A     | 1.748 | P     | A | M | A | A | P | A | A | A |   |
| 1031464 | -          | gbs0644 | cyX  | Hypothetical                         | Hypothetical protein                                         | 0.938  | P | P                                                       | P                   | P     | P | P | P | P | P     | 2.654 | P     | P | P | P | P | P | P | P | P |   |
| 1031688 | COG0331I   | gbs0645 | cyD  | Metabolism and transport             | Fatty acid and phospholipids                                 | 0.653  | P | P                                                       | P                   | P     | P | P | P | P | P     | 1.817 | P     | P | P | P | P | P | P | P | P |   |
| 1031686 | COG1028QR  | gbs0646 | cyG  | Metabolism and transport             | Fatty acid and phospholipids                                 | 0.635  | P | P                                                       | P                   | P     | P | P | P | P | P     | 1.926 | P     | P | P | P | P | P | P | P | P |   |
| 1031687 | COG0236IQ  | gbs0647 | acpC | Metabolism and transport             | Fatty acid and phospholipids                                 | 0.829  | P | P                                                       | P                   | P     | P | P | P | P | P     | 2.304 | P     | M | P | P | P | P | P | P | P |   |
| 1031692 | COG0764I   | gbs0648 | cyZ  | Metabolism and transport             | Fatty acid and phospholipids                                 | 0.844  | P | P                                                       | P                   | P     | P | P | P | P | P     | 1.700 | P     | P | P | M | P | P | A | A | A |   |
| 1031693 | COG1131V   | gbs0649 | cyA  | Transport and binding proteins       | Unknown substrate                                            | 1.274  | P | A                                                       | P                   | P     | P | P | P | P | P     | 1.984 | P     | P | P | P | P | P | P | P | P |   |
| 1031691 | -          | gbs0650 | cyB  | Transport and binding proteins       | Unknown substrate                                            | 1.782  | P | P                                                       | P                   | P     | P | P | P | P | P     | 2.377 | P     | A | P | A | P | P | A | M | A |   |
| 1031430 | -          | gbs0651 | cyE  | Hypothetical                         | Hypothetical protein                                         | 1.877  | P | P                                                       | P                   | P     | P | P | P | P | P     | 2.034 | P     | M | A | P | P | P | P | P | P |   |
| 1031690 | COG0404E   | gbs0652 | cyF  | Metabolism and transport             | Amino acids, peptides, aminosugars and amines                | 1.537  | P | P                                                       | P                   | P     | P | P | P | P | P     | 2.556 | P     | P | P | P | P | P | P | P | P |   |
| 1031699 | COG0304IQ  | gbs0653 | cyll | Metabolism and transport             | Fatty acid and phospholipids                                 | 0.957  | P | 3-oxoacyl-[acyl-carrier-protein] synthase (EC 2.3.1.41) | Chain length factor | 1.959 | P | P | P | P | P     | P     | 1.959 | P | P | P | P | P | P | P | P | P |
| 1031696 | COG1819GC  | gbs0654 | cyJ  | Metabolism and transport             | Carbohydrates, organic alcohols, and acids                   | 2.798  | P | P                                                       | P                   | P     | P | P | P | P | P     | 2.845 | P     | P | A | P | P | P | P | P | P |   |
| 1031698 | -          | gbs0655 | cyK  | Hypothetical                         | Hypothetical protein                                         | 3.902  | P | P                                                       | P                   | P     | P | P | P | P | P     | 3.087 | P     | P | P | P | P | P | P | P | P |   |
| 1031700 | COG0577V   | gbs0657 |      | Transport and binding proteins       | Unknown substrate                                            | 1.690  | A | A                                                       | A                   | A     | A | A | A | A | A     | 0.405 | A     | A | A | A | A | A | A | A | A |   |
| 1031695 | -          | gbs0658 |      | Hypothetical                         | Hypothetical protein                                         | 0.966  | A | A                                                       | A                   | A     | A | A | A | A | A     | 0.805 | A     | A | A | A | A | A | A | A | A |   |
| 1031701 | COG1136V   | gbs0659 |      | Transport and binding proteins       | Unknown substrate                                            | 1.426  | A | A                                                       | A                   | A     | A | A | A | A | A     | 0.079 | A     | A | A | A | A | A | A | A | A |   |
| 1031115 | COG4529S   | gbs0660 |      | Hypothetical                         | Hypothetical exported protein                                | 0.359  | P | A                                                       | P                   | A     | M | A | A | A | A     | 0.919 | P     | A | A | A | A | A | A | A | A |   |
| 1031706 | -          | gbs0661 |      | Cellular processes                   | DNA transformation                                           | 0.636  | P | P                                                       | P                   | P     | P | P | P | P | P     | 2.443 | P     | P | P | P | P | P | P | P | P |   |
| 1031702 | COG0586S   | gbs0662 |      | General function predicted only      | DedA family protein                                          | 1.269  | P | M                                                       | A                   | A     | A | P | A | P | A     | 1.291 | A     | A | A | A | A | A | A | A | A |   |
| 1031703 | COG4619R   | gbs0663 |      | Transport and binding proteins       | Unknown substrate                                            | 0.606  | P | A                                                       | P                   | A     | P | M | P | P | P     | 0.617 | A     | A | A | A | A | A | A | A | A |   |
| 1031704 | COG0390R   | gbs0664 |      | Transport and binding proteins       | Unknown substrate                                            | 0.674  | P | A                                                       | M                   | A     | A | A | A | A | A     | 0.804 | A     | A | A | A | A | A | A | A | A |   |
| 1031705 | -          | gbs0665 |      | Hypothetical                         | Hypothetical protein                                         | 0.780  | P | A                                                       | P                   | P     | P | P | P | P | P     | 0.557 | P     | A | P | A | A | A | A | A | A |   |
| 1031707 | COG0583K   | gbs0666 |      | Cellular processes                   | Transcription                                                | 0.962  | P | A                                                       | P                   | P     | P | P | P | P | P     | 1.125 | P     | A | A | A | A | A | A | A | A |   |
| 1031052 | COG3641R   | gbs0667 |      | Hypothetical                         | Hypothetical membrane spanning protein                       | 1.105  | P | P                                                       | P                   | P     | P | P | P | P | P     | 0.316 | P     | A | P | P | P | P | P | P | P |   |
| 1031708 | COG1052CHF | gbs0668 | ddh  | Metabolism and transport             | Central intermediary metabolism                              | 1.304  | P | P                                                       | P                   | P     | P | P | P | P | P     | 0.315 | P     | A | P | P | P | P | P | M | A |   |
| 1031711 | COG2211G   | gbs0669 |      | Metabolism and transport             | Carbohydrates, organic alcohols, and acids                   | 0.394  | A | A                                                       | A                   | A     | A | A | A | A | A     | 0.372 | A     | A | A | A | A | A | A | A | A |   |
| 1031712 | COG0524G   | gbs0670 |      | Metabolism and transport             | Carbohydrates, organic alcohols, and acids                   | 0.324  | A | A                                                       | A                   | A     | A | A | A | A | A     | 0.056 | A     | A | A | A | A | A | A | A | A |   |
| 1031721 | COG3250G   | gbs0671 | lacZ | Metabolism and transport             | Carbohydrates, organic alcohols, and acids                   | 1.882  | P | A                                                       | A                   | A     | A | A | A | A | A     | 0.833 | A     | A | A | A | A | A | A | A | A |   |
| 1031715 | COG2186K   | gbs0672 |      | Cellular processes                   | Transcription                                                | 0.720  | P | A                                                       | A                   | A     | A | A | A | A | A     | 1.003 | A     | A | A | A | A | A | A | A | A |   |
| 1031709 | COG0800G   | gbs0673 |      | Metabolism and transport             | Carbohydrates, organic alcohols, and acids                   | 0.394  | P | P                                                       | P                   | M     | P | A | P | A | A     | 1.802 | P     | A | M | M | A | A | A | A | A |   |
| 1030888 | COG1904G   | gbs0674 |      | Metabolism and transport             | Carbohydrates, organic alcohols, and acids                   | 0.935  | P | A                                                       | A                   | A     | A | A | A | A | A     | 1.329 | P     | A | A | A | A | A | A | A | A |   |
| 1031717 | COG1312G   | gbs0675 |      | Metabolism and transport             | Carbohydrates, organic alcohols, and acids                   | 0.749  | A | A                                                       | A                   | A     | A | A | A | A | A     | 0.496 | A     | A | A | A | A | A | A | A | A |   |
| 1031719 | COG1028QR  | gbs0676 |      | Metabolism and transport             | Carbohydrates, organic alcohols, and acids                   | 0.529  | P | M                                                       | P                   | A     | P | P | A | A | A     | 0.566 | P     | A | P | P | P | A | A | A | A |   |
| 1031716 | COG0546R   | gbs0677 |      | Metabolism and transport             | Central intermediary metabolism                              | 1.005  | P | A                                                       | A                   | A     | A | A | A | A | A     | 0.777 | P     | A | A | P | A | A | A | A | A |   |
| 1031371 | -          | gbs0678 |      | Metabolism and transport             | Carbohydrates, organic alcohols, and acids                   | 0.567  | A | A                                                       | A                   | A     | A | A | A | A | A     | 3.168 | A     | A | A | A | A | A | A | A | A |   |
| 1031724 | COG0006E   | gbs0679 | pepQ | Metabolism and transport             | Amino acids, peptides, aminosugars and amines                | 0.760  | P | P                                                       | P                   | P     | P | P | P | P | P     | 1.690 | P     | A | P | P | P | P | P | P | P |   |
| 1031718 | COG1609K   | gbs0680 | ccpA | Cellular processes                   | Transcription                                                | 1.397  | P | P                                                       | P                   | P     | P | P | P | P | P     | 0.778 | P     | P | P | P | P | P | P | P | P |   |
| 1031212 | -          | gbs0681 |      | Metabolism and transport             | Carbohydrates, organic alcohols, and acids                   | 1.295  | P | P                                                       | A                   | P     | P | P | P | P | P     | 1.135 | P     | A | P | P | P | P | P | P | P |   |
| 1031321 | COG0438M   | gbs0682 |      | Metabolism and transport             | Central intermediary metabolism                              | 2.410  | P | P                                                       | P                   | P     | P | P | P | P | P     | 1.723 | P     | A | P | A | A | P | A | A | A |   |
| 1031722 | COG0438M   | gbs0683 |      | Metabolism and transport             | Central intermediary metabolism                              | 2.146  | P | P                                                       | P                   | P     | P | P | P | P | P     | 1.399 | P     | A | P | A | P | P | P | P | P |   |
| 1031726 | COG0441J   | gbs0684 | thrS | Cellular processes                   | Translation, ribosomal structure and biogenesis              | 1.103  | P | P                                                       | P                   | P     | P | P | P | P | P     | 0.631 | P     | P | P | A | P | P | P | M | A |   |
| 1031725 | COG0745TK  | gbs0685 |      | Cellular processes                   | Transcription                                                | 4.461  | P | A                                                       | A                   | A     | A | A | A | A | A     | 5.149 | P     | A | A | A | A | A | A | A | A | A |
| 1031730 | -          | gbs0686 |      | Hypothetical                         | Hypothetical cytosolic protein                               | 1.518  | P | P                                                       | P                   | P     | P | P | P | P | P     | 0.853 | P     | A | P | A | P | P | P | P | P |   |
| 1031723 | -          | gbs0687 |      | Hypothetical                         | Hypothetical membrane associated protein                     | 0.154  | P | P                                                       | P                   | P     | P | P | P | P | P     | 0.142 | P     | P | P | P | P | P | P | P | P |   |
| 1031728 | COG0765E   | gbs0688 |      | Metabolism and transport             | Amino acids, peptides, aminosugars and amines                | 8.312  | P | A                                                       | P                   | P     | P | M | P | A | A     | 4.488 | P     | A | A | A | P | A | A | A | A |   |
| 1031732 | COG0765E   | gbs0689 |      | Metabolism and transport             | Amino acids, peptides, aminosugars and amines                | 15.956 | P | A                                                       | A                   | A     | A | A | A | A | A     | 5.152 | P     | A | A | A | A | A | A | A | A |   |
| 1031714 | COG0834ET  | gbs0690 |      | Metabolism and transport             | Amino acids, peptides, aminosugars and amines                | 10.446 | P | A                                                       | A                   | A     | A | A | A | A | A     | 5.471 | P     | A | A | A | A | A | A | A | A |   |
| 1031301 | COG1126E   | gbs0691 |      | Metabolism and transport             | Amino acids, peptides, aminosugars and amines                | 10.191 | P | A                                                       | A                   | A     | A | A | A | A | A     | 1.968 | A     | A | A | A | A | A | A | A | A |   |
| 1031731 | -          | gbs0692 |      | Hypothetical                         | Hypothetical protein                                         | 0.271  | P | A                                                       | A                   | A     | A | A | A | A | A     | 0.307 | A     | A | A | A | A | A | A | A | A |   |
| 1031733 | -          | gbs0693 |      | Hypothetical                         | Hypothetical protein                                         | 0.713  | P | A                                                       | A                   | A     | A | A | M | A | A     | 0.361 | P     | A | A | A | A | A | A | A | A |   |
| 1031727 | -          | gbs0694 |      | Hypothetical                         | Hypothetical protein                                         | 0.213  | A | A                                                       | P                   | P     | A | A | A | A | A     | 0.228 | P     | A | P | A | P | A | A | A | A |   |
| 1031740 | -          | gbs0695 |      | Hypothetical                         | Hypothetical protein                                         | 0.305  | A | A                                                       | A                   | A     | A | A | A | A | A     | 0.323 | A     | A | A | A | A | A | A | A | A |   |
| 1031737 | -          | gbs0696 |      | Hypothetical                         | Hypothetical protein                                         | 1.416  | A | A                                                       | A                   | A     | A | A | A | A | A     | 0.450 | A     | A | A | A | A | A | A | A | A |   |
| 1031741 | -          | gbs0697 |      | Hypothetical                         | Hypothetical protein                                         | 0.928  | M | A                                                       | A                   | A     | A | A | A | A | A     | 0.354 | A     | A | A | A | A | A | A | A | A |   |
| 1031735 | -          | gbs0698 |      | General function predicted only      | RepR protein                                                 | 0.646  | A | A                                                       | P                   | A     | A | A | A | A | A     | 0.084 | A     | M | A | A | A | A | A | A | A |   |
| 1031745 | -          | gbs0699 |      | Hyp                                  |                                                              |        |   |                                                         |                     |       |   |   |   |   |       |       |       |   |   |   |   |   |   |   |   |   |

|         |             |         |       |                                 |                                                                   |                                                                                |       |   |   |   |   |   |   |   |   |       |       |       |   |   |   |   |   |   |   |   |   |
|---------|-------------|---------|-------|---------------------------------|-------------------------------------------------------------------|--------------------------------------------------------------------------------|-------|---|---|---|---|---|---|---|---|-------|-------|-------|---|---|---|---|---|---|---|---|---|
| 1031151 | COG2141C    | gbs0753 |       | Metabolism and transport        | Energy production and conversion                                  | Luciferase-like monooxygenase (EC 1.14.-.-)                                    | 0.448 | P | A | A | A | A | A | A | A | A     | A     | 0.483 | A | A | A | A | A | A | A | A | A |
| 1031205 | COG2183K    | gbs0754 |       | Cellular processes              | Transcription                                                     | TRANSCRIPTION ACCESSORY PROTEIN (S1 RNA binding domain)                        | 3.709 | P | A | A | A | A | A | A | A | A     | A     | 1.549 | P | A | A | A | A | A | A | A | A |
| 1031050 | -           | gbs0755 |       | Cellular processes              | Toxin production and resistance                                   | Metallopeptidase, SprT family (EC 3.4.24.-)                                    | 1.749 | P | P | P | P | P | P | P | P | P     | P     | 1.126 | P | A | P | A | P | P | P | P | P |
| 1031462 | COG1983KT   | gbs0756 |       | Cellular processes              | Transcription                                                     | Stress-responsive transcriptional regulator PspC                               | 0.932 | P | P | P | P | P | P | P | P | P     | P     | 0.396 | P | P | P | P | P | P | P | P | P |
| 1031783 | COG1493T    | gbs0757 | ptsK  | Cellular processes              | Signal transduction                                               | HPR(SER) KINASE (EC 2.7.1.-) PHOSPHATASE (EC 3.1.3.-)                          | 0.550 | P | P | P | P | P | P | P | P | P     | P     | 0.720 | P | P | P | P | P | P | P | P | P |
| 1031041 | -           | gbs0758 | lgt   | Cellular processes              | Posttranslational modification, protein turnover, chaperones      | Prolipoprotein diacylglycerol transferase (EC 2.4.99.-)                        | 0.741 | P | P | P | P | P | P | P | P | P     | P     | 0.801 | P | P | P | P | P | P | P | P | P |
| 1031264 | COG4768R    | gbs0759 |       | Hypothetical                    |                                                                   | Hypothetical protein                                                           | 0.559 | P | P | P | P | P | P | P | P | P     | P     | 0.626 | P | P | P | P | P | P | P | P | P |
| 1031781 | -           | gbs0760 |       | Hypothetical                    |                                                                   | Hypothetical exported protein                                                  | 0.574 | P | P | P | P | P | P | P | P | P     | P     | 0.665 | P | P | P | P | P | P | P | P | P |
| 1031786 | -           | gbs0761 |       | Hypothetical                    |                                                                   | Hypothetical protein                                                           | 2.905 | P | P | P | P | P | P | P | P | P     | P     | 0.769 | P | P | P | P | P | P | P | P | P |
| 1031183 | -           | gbs0762 |       | Cellular processes              | Posttranslational modification, protein turnover, chaperones      | Peptidase family U32                                                           | 5.227 | P | A | P | P | P | P | P | P | P     | P     | 0.946 | P | A | P | P | P | P | P | P | P |
| 1031342 | -           | gbs0763 |       | Cellular processes              | Posttranslational modification, protein turnover, chaperones      | Peptidase family U32                                                           | 6.688 | P | A | A | A | A | A | A | A | A     | A     | 1.041 | A | A | P | A | A | A | A | A | A |
| 1031363 | COG4443S    | gbs0764 |       | Hypothetical                    |                                                                   | Hypothetical cytosolic protein                                                 | 0.619 | P | A | P | A | P | P | P | P | P     | P     | 0.793 | A | A | P | A | A | A | A | A | A |
| 1031785 | -           | gbs0765 |       | Hypothetical                    |                                                                   | Hypothetical protein                                                           | 0.694 | P | P | P | P | P | P | P | P | P     | P     | 0.503 | P | P | P | P | P | P | P | P | P |
| 1031379 | COG1914P    | gbs0766 |       | Metabolism and transport        | Inorganic ion transport and metabolism                            | Manganese transport protein mntH                                               | 2.452 | P | P | P | P | P | P | P | P | P     | P     | 1.237 | P | A | P | A | P | P | A | A | A |
| 1031104 | 0117H, COG1 | gbs0767 |       | Metabolism and transport        | Cofactors, prosthetic groups, and carriers                        | Diaminohydroxyphosphoribosylaminopyrimidine deaminase (EC 3.5.4.26) 5-amin     | 2.048 | P | P | P | P | P | P | P | P | P     | P     | 2.390 | P | A | P | A | P | A | P | A | P |
| 1031789 | COG0307H    | gbs0768 |       | Metabolism and transport        | Cofactors, prosthetic groups, and carriers                        | Riboflavin synthase alpha chain (EC 2.5.1.9)                                   | 1.119 | P | P | P | P | P | P | P | P | P     | P     | 2.414 | P | A | P | P | P | P | A | P | A |
| 1031790 | COG0807H    | gbs0769 |       | Metabolism and transport        | Cofactors, prosthetic groups, and carriers                        | GTP cyclohydrolase II (EC 3.5.4.25) 3,4-dihydroxy-2-butanone-4-phosphate syntn | 1.037 | P | P | P | P | P | P | P | P | P     | P     | 2.786 | P | A | P | P | P | P | A | P | A |
| 1031373 | -           | gbs0770 |       | Metabolism and transport        | Cofactors, prosthetic groups, and carriers                        | 6,7-dimethyl-8-ribitylmazine synthase (EC 2.5.1.9)                             | 0.841 | P | P | P | P | P | P | P | P | P     | P     | 3.188 | P | P | P | P | P | P | P | P | P |
| 1031784 | COG1190J    | gbs0771 | lysS  | Cellular processes              | Translation, ribosomal structure and biogenesis                   | Lysyl-tRNA synthetase (EC 6.1.1.6)                                             | 2.529 | P | P | P | P | P | P | P | P | P     | P     | 1.137 | P | P | P | P | P | P | P | P | P |
| 1031788 | COG1011R    | gbs0772 |       | Metabolism and transport        | Central intermediary metabolism                                   | Haloacetyl dehalogenase-like hydrolase                                         | 2.286 | P | A | A | A | A | A | A | A | A     | A     | 1.343 | P | A | A | A | A | A | A | A | A |
| 1031445 | COG0406G    | gbs0773 |       | Metabolism and transport        | Carbohydrates, organic alcohols, and acids                        | Phosphoglycerate mutase family protein                                         | 0.350 | P | P | P | P | P | P | P | P | P     | P     | 0.683 | P | P | P | P | P | P | P | P | P |
| 1031793 | COG2606S    | gbs0774 |       | Cellular processes              | Transcription                                                     | Transcriptional regulator                                                      | 0.126 | P | P | P | P | P | P | P | P | P     | P     | 1.044 | P | P | P | P | P | P | P | P | P |
| 1031787 | 51MG, COG0  | gbs0775 |       | General function predicted only |                                                                   | NADH-ubiquinone oxidoreductase 39-40 kDa subunit homolog                       | 5.511 | P | A | P | A | A | A | A | A | A     | 1.966 | P     | A | P | A | A | A | A | A | A | A |
| 1031042 | COG3757M    | gbs0776 |       | Cellular processes              | Posttranslational modification, protein turnover, chaperones      | N-acetylmuramoyl-L-alanine amidase (EC 3.5.1.28)                               | 2.058 | P | P | P | P | P | P | P | P | P     | P     | 1.262 | P | P | P | P | P | P | P | P | P |
| 1031791 | -           | gbs0777 |       | Hypothetical                    |                                                                   | Integral membrane protein                                                      | 1.029 | P | P | P | P | P | P | P | P | P     | P     | 0.760 | P | A | P | A | A | A | A | A | A |
| 1030905 | -           | gbs0778 |       | Hypothetical                    |                                                                   | Hypothetical exported protein                                                  | 0.653 | P | P | P | P | P | P | P | P | P     | P     | 0.558 | P | P | P | P | P | P | P | P | P |
| 1031466 | COG1164E    | gbs0779 | pepF  | Metabolism and transport        | Amino acids, peptides, aminosugars and amines                     | Oligoendopeptidase F (EC 3.4.24.-)                                             | 1.105 | P | P | P | P | P | P | P | P | P     | P     | 0.725 | P | P | P | P | P | P | P | P | P |
| 1031917 | COG2352C    | gbs0780 | ppc   | Metabolism and transport        | Energy production and conversion                                  | Phosphoenolpyruvate carboxylase (EC 4.1.1.31)                                  | 1.865 | P | P | P | P | P | P | P | P | P     | P     | 1.272 | P | A | P | A | P | A | P | A | P |
| 1031792 | -           | gbs0781 | ftsW  | Cellular processes              | Cell division                                                     | Cell division protein ftsW                                                     | 3.193 | P | A | P | A | M | A | A | A | A     | 0.624 | P     | A | P | A | A | A | A | A | A | A |
| 1031913 | COG0050J    | gbs0782 | tuf   | Cellular processes              | Translation, ribosomal structure and biogenesis                   | Protein Translation Elongation Factor Tu (EF-TU)                               | 0.767 | P | P | P | P | P | P | P | P | P     | P     | 0.529 | P | P | P | P | P | P | P | P | P |
| 1031916 | COG0149G    | gbs0783 | tpiA  | Metabolism and transport        | Carbohydrates, organic alcohols, and acids                        | Triosephosphate isomerase (EC 5.3.1.1)                                         | 0.463 | P | P | P | P | P | P | P | P | P     | P     | 0.717 | P | P | P | P | P | P | P | P | P |
| 1031918 | COG0588G    | gbs0784 | gpmA  | Metabolism and transport        | Carbohydrates, organic alcohols, and acids                        | Phosphoglycerate mutase (EC 5.4.2.1)                                           | 0.907 | P | P | P | P | P | P | P | P | P     | P     | 0.945 | P | P | P | P | P | P | P | P | P |
| 1031914 | COG0768M    | gbs0785 |       | Cell Envelope                   | Biosynthesis and degradation of murein sacculus and peptidoglycan | Penicillin-binding protein                                                     | 3.027 | P | P | P | P | P | P | P | P | P     | P     | 1.077 | P | A | P | A | P | P | A | P | A |
| 1031920 | COG0353L    | gbs0786 | recR  | Cellular processes              | DNA replication, recombination and repair                         | Recombination protein recR                                                     | 2.711 | P | P | P | P | P | P | P | P | P     | P     | 0.752 | P | P | A | P | P | P | A | P | A |
| 1031911 | COG1181M    | gbs0787 | ddl   | Cell Envelope                   | Biosynthesis and degradation of murein sacculus and peptidoglycan | D-alanine--D-alanine ligase (EC 6.3.2.4)                                       | 3.030 | P | A | A | M | A | A | A | A | A     | 1.058 | P     | A | P | A | A | A | A | A | A | A |
| 1031919 | COG0770M    | gbs0788 | murF  | Cell Envelope                   | Biosynthesis and degradation of murein sacculus and peptidoglycan | UDP-N-acetylmuramoyl-tripeptide--D-alanyl-D-alanine ligase (EC 6.3.2.10)       | 1.915 | P | P | P | M | P | P | P | P | P     | 1.076 | P     | P | P | P | P | P | P | P | P | P |
| 1031915 | -           | gbs0789 |       | Transport and binding proteins  | Unknown substrate                                                 | Transporter, MFS superfamily                                                   | 0.723 | P | P | P | P | P | P | P | P | P     | P     | 0.608 | P | A | P | A | P | P | A | P | A |
| 1031924 | COG5522S    | gbs0790 |       | Hypothetical                    |                                                                   | Hypothetical membrane spanning protein                                         | 3.466 | P | P | P | A | P | P | P | P | P     | 1.917 | P     | A | M | A | P | P | A | P | A | P |
| 1031910 | -           | gbs0791 |       | Hypothetical                    |                                                                   | LPXTG Surface anchor protein                                                   | 1.396 | P | M | P | P | P | P | P | P | P     | P     | 0.872 | P | A | P | M | P | P | A | P | A |
| 1031905 | COG4108J    | gbs0792 | prfC  | Cellular processes              | Translation, ribosomal structure and biogenesis                   | Bacterial Peptide Chain Release Factor 3 (RF-3)                                | 1.718 | P | P | P | M | P | P | P | P | P     | 0.685 | P     | A | P | P | P | P | M | P | P | P |
| 1031912 | -           | gbs0793 |       | Hypothetical                    |                                                                   | Hypothetical cytosolic protein                                                 | 1.491 | P | P | P | P | P | P | P | P | P     | P     | 1.963 | P | A | P | A | P | P | A | P | A |
| 1031922 | COG1135P    | gbs0794 |       | Metabolism and transport        | Inorganic ion transport and metabolism                            | Probable D-methionine transport ATP-binding protein metN                       | 1.758 | P | P | P | A | P | P | P | P | P     | P     | 0.932 | P | A | A | A | P | P | M | P | M |
| 1031921 | COG2011P    | gbs0795 |       | Transport and binding proteins  | Unknown substrate                                                 | ABC transporter permease protein                                               | 3.548 | P | P | P | A | P | P | P | P | P     | P     | 1.189 | P | A | P | A | P | A | P | A | P |
| 1031923 | COG1464P    | gbs0796 |       | Transport and binding proteins  | Unknown substrate                                                 | ABC transporter substrate-binding protein                                      | 1.561 | P | P | P | A | P | P | P | P | P     | P     | 1.138 | P | P | P | A | P | P | P | P | P |
| 1031907 | COG0513KJ   | gbs0797 | deaD  | Cellular processes              | DNA replication, recombination and repair                         | ATP-dependent RNA helicase                                                     | 2.957 | P | P | A | A | P | P | P | M | P     | 0.773 | A     | A | A | A | A | P | A | P | A | P |
| 1031909 | COG2827L    | gbs0798 |       | Hypothetical                    |                                                                   | Hypothetical protein with endo excinuclease domain                             | 1.337 | P | A | P | M | P | P | P | A | P     | 1.313 | P     | A | P | A | A | M | A | P | A | P |
| 1031906 | COG4123R    | gbs0799 |       | Metabolism and transport        | Central intermediary metabolism                                   | Methyltransferase (EC 2.1.1.-)                                                 | 1.850 | P | A | A | A | A | A | A | A | A     | 1.518 | P     | A | A | A | A | A | A | A | A | A |
| 1031926 | COG0204I    | gbs0800 |       | Metabolism and transport        | Fatty acid and phospholipids                                      | 1-acyl-sn-glycerol-3-phosphate acyltransferase (EC 2.3.1.51)                   | 1.292 | P | P | P | P | P | P | P | P | P     | 0.662 | P     | P | P | P | P | P | P | P | P | P |
| 1031925 | COG1555L    | gbs0801 |       | Cellular processes              | DNA transformation                                                | COME operon protein 1                                                          | 0.194 | A | A | A | A | A | A | A | A | A     | 0.083 | A     | A | A | A | A | A | A | A | A | A |
| 1031903 | 0658R, COG2 | gbs0802 | comEC | General function predicted only |                                                                   | COME operon protein 3                                                          | 1.091 | P | A | A | A | A | A | A | A | A     | 0.240 | A     | A | A | A | A | A | A | A | A | A |
| 1031902 | COG0561R    | gbs0803 |       | Metabolism and transport        | Central intermediary metabolism                                   | Hydrolase (HAD superfamily)                                                    | 1.185 | P | A | P | P | A | P | A | M | 0.924 | P     | A     | A | A | A | A | A | A | A | A | A |
| 1031904 | COG1609K    | gbs0804 |       | Cellular processes              | Transcription                                                     | Catabolite control protein B                                                   | 1.374 | P | P | P | P | P | P | P | P | P     | 0.641 | P     | A | P | M | P | P | A | P | A | P |
| 1031908 | COG0657I    | gbs0805 |       | Metabolism and transport        | Fatty acid and phospholipids                                      | Esterase (EC 3.1.1.-)                                                          | 4.525 | A | A | A | A | A | A | A | A | A     | 0.639 | A     | A | A | A | A | A | A | A | A | A |
| 1031888 | COG0500QR   | gbs0806 |       | Metabolism and transport        | Secondary metabolites                                             | Biotin synthesis protein bioC                                                  | 0.438 | P | P | P | P | P | P | P | P | P     | 0.606 | P     | P | P | P | P | P | A | P | A | P |
| 1031901 | COG1466L    | gbs0807 |       | Cellular processes              | DNA replication, recombination and repair                         | DNA polymerase III, delta subunit (EC 2.7.7.7)                                 | 1.566 | P | P | P | P | P | P | P | P | P     | 0.887 | P     | M | P | P | P | P | P | P | P | P |
| 1031927 | COG0605P    | gbs0808 | soeA  | Metabolism and transport        | Inorganic ion transport and metabolism                            | Superoxide dismutase (EC 1.15.1.1)                                             | 0.387 | P | P | P | P | P | P | P | P | P     | 0.403 | P     | P | P | P | P | P | P | P | P | P |
| 1031900 | COG3711K    | gbs0809 | licT  | Cellular processes              | Transcription                                                     | Transcription antiterminator, BglG family                                      | 0.506 | P | A | P | A | A | A | A | A | A     | 1.792 | P     | P | P | A | A | A | A | P | A | P |
| 1031929 | COG1263G    | gbs0810 |       | Metabolism and transport        | Carbohydrates, organic alcohols, and acids                        | PTS system, beta-glucosidase-specific IIABC component (EC 2.7.1.69)            | 0.307 | A | A | A | A | A | A | A | A | A     | 1.047 | P     | A | A | A | A | A | A | A | A | A |
| 1031897 | -           | gbs0811 | bgIA  | Metabolism and transport        | Carbohydrates, organic alcohols, and acids                        | 6-phospho-beta-glucosidase (EC 3.2.1.86)                                       | 1.520 | P | A | A | A | A | A | A | A | A     | 1.900 | P     | A | P | A | A | A | A | P | A | P |
| 1031899 | COG3835KT   | gbs0812 |       | Cellular processes              | Transcription                                                     | Transcriptional regulatory protein                                             | 1.109 | P | A | M | A | A | A | M | P | 1.796 | P     | A     | A | P | A | A | A | A | A | A | A |
| 1031896 | -           | gbs0813 |       | Metabolism and transport        | Energy production and conversion                                  | Glycerate kinase (EC 2.7.1.31)                                                 | 0.728 | A | A | A | A | A | A | A | A | A     | 0.262 | A     | A | A | A | A | A | A | A | A | A |
| 1031898 | COG2610GE   | gbs0814 |       | Metabolism and transport        | Carbohydrates, organic alcohols, and acids                        | Glucanate permease                                                             | 0.498 | P | A | A | A | A | A | A | A | A     | 0.514 | P     | A | P | A | P | M | A | P | A | P |
| 1031893 | 1686M, COG2 | gbs0815 |       | Cellular processes              | Posttranslational modification, protein turnover, chaperones      | Peptidase family S11                                                           | 3.068 | P | A | A | A | A | A | A | A | A     | 1.253 | P     | A | P | A | A | A | A | A | A | A |
| 1031928 | COG1846K    | gbs0816 |       | Cellular processes</            |                                                                   |                                                                                |       |   |   |   |   |   |   |   |   |       |       |       |   |   |   |   |   |   |   |   |   |



|         |             |         |       |                                 |                                                                   |                                                                                  |       |   |   |   |   |   |   |   |   |   |       |       |   |   |   |   |   |   |   |   |   |
|---------|-------------|---------|-------|---------------------------------|-------------------------------------------------------------------|----------------------------------------------------------------------------------|-------|---|---|---|---|---|---|---|---|---|-------|-------|---|---|---|---|---|---|---|---|---|
| 1029826 | 0340H, COG1 | gbs0848 | birA  | Cellular processes              | Transcription                                                     | Biotin operon repressor Biotin-[acetyl-CoA-carboxylase] synthetase (EC 6.3.4.15) | 1.398 | P | A | A | A | A | A | A | A | A | A     | 0.801 | P | A | A | A | A | A | A | A | A |
| 1029821 | COG0192H    | gbs0849 | metK2 | Metabolism and transport        | Cofactors, prosthetic groups, and carriers                        | S-adenosylmethionine synthetase (EC 2.5.1.6)                                     | 2.007 | P | P | M | A | P | P | P | M |   |       | 1.485 | P | A | P | A | P | P | M | A |   |
| 1029828 | -           | gbs0850 | ftsB  | Hypothetical                    |                                                                   | Hypothetical protein                                                             | 1.196 | P | A | A | A | A | A | A | A |   |       | 1.316 | A | A | A | A | A | A | A | A |   |
| 1029823 | -           | gbs0851 |       | Hypothetical                    |                                                                   | Hypothetical protein                                                             | 1.152 | P | A | A | A | A | A | A | A |   |       | 0.828 | A | A | A | A | A | A | A | A |   |
| 1029834 | -           | gbs0852 |       | Hypothetical                    |                                                                   | Hypothetical protein                                                             | 1.144 | P | A | A | A | A | A | A | A |   |       | 0.350 | A | A | A | A | A | A | A | A |   |
| 1029824 | COG4732S    | gbs0853 |       | Transport and binding proteins  | Unknown substrate                                                 | Hydroxyethylthiazole permease                                                    | 0.186 | A | A | A | A | A | A | A | A |   |       | 0.273 | A | A | A | A | A | A | A | A |   |
| 1029833 | COG4721S    | gbs0854 |       | Transport and binding proteins  | Unknown substrate                                                 | Hydroxymethylpyrimidine transport system permease protein                        | 1.630 | A | A | A | A | A | A | A | A |   |       | 0.570 | A | A | A | A | A | A | A | A |   |
| 1029836 | COG1122P    | gbs0855 |       | Metabolism and transport        | Inorganic ion transport and metabolism                            | Transporter                                                                      | 2.649 | A | A | A | A | A | A | A | A |   |       | 0.848 | A | A | A | A | A | A | A | A |   |
| 1029832 | COG0619P    | gbs0856 |       | Metabolism and transport        | Inorganic ion transport and metabolism                            | Hydroxymethylpyrimidine transport system permease protein                        | 1.472 | A | A | A | A | A | A | A | A |   |       | 0.404 | A | A | A | A | A | A | A | A |   |
| 1029838 | COG0819K    | gbs0857 |       | Cellular processes              | Transcription                                                     | Transcriptional activator tenA                                                   | 0.511 | A | A | A | A | A | A | A | A |   |       | 0.477 | P | A | A | A | A | A | A | A |   |
| 1029827 | COG0351H    | gbs0858 |       | Metabolism and transport        | Cofactors, prosthetic groups, and carriers                        | Phosphomethylpyrimidine kinase (EC 2.7.4.7)                                      | 0.934 | A | A | A | A | A | A | A | A |   |       | 0.745 | A | A | A | A | A | A | A | A |   |
| 1029837 | COG2145H    | gbs0859 |       | Metabolism and transport        | Cofactors, prosthetic groups, and carriers                        | Hydroxyethylthiazole kinase (EC 2.7.1.50)                                        | 0.549 | P | A | A | M | A | A | A | A |   |       | 0.381 | P | A | A | M | A | A | A | P |   |
| 1029839 | COG0352H    | gbs0860 |       | Metabolism and transport        | Cofactors, prosthetic groups, and carriers                        | Thiamin-phosphate pyrophosphorylase (EC 2.5.1.3)                                 | 0.958 | M | A | A | A | A | A | A | A |   |       | 0.745 | P | A | A | A | A | A | A | A |   |
| 1029841 | COG0766M    | gbs0861 | murZ  | Cell Envelope                   | Biosynthesis and degradation of murein sacculus and peptidoglycan | UDP-N-acetylglucosamine 1-carboxyvinyltransferase (EC 2.5.1.7)                   | 3.465 | P | A | A | A | P | A | A | A |   |       | 1.190 | P | A | A | A | A | A | A | A |   |
| 1029840 | COG1670J    | gbs0862 |       | Cellular processes              | Transcription                                                     | Ribosomal-protein-S5-alanine acetyltransferase (EC 2.3.1.128)                    | 2.247 | P | A | P | P | P | P | M |   |   | 1.446 | P     | A | P | A | P | P | P | P |   |   |
| 1029848 | COG4109K    | gbs0863 |       | Cellular processes              | Transcription                                                     | Cytosolic protein containing multiple CBS domains                                | 1.995 | P | A | M | A | P | A | A | A |   |       | 1.182 | P | A | M | A | A | P | M | A |   |
| 1029845 | COG0024J    | gbs0864 | map   | Cellular processes              | Transcription                                                     | Methionine aminopeptidase (EC 3.4.11.18)                                         | 1.971 | P | P | P | P | P | P | P |   |   | 1.307 | P     | P | P | P | P | P | P | P |   |   |
| 1029846 | COG1295S    | gbs0865 |       | Cellular processes              | Transcription                                                     | Ribonuclease BN (EC 3.1.-.-)                                                     | 2.949 | P | P | P | P | P | P | P |   |   | 1.199 | P     | M | P | P | P | P | P | P |   |   |
| 1029847 | COG2246S    | gbs0866 |       | General function predicted only |                                                                   | Bacteronol-linked monosaccharide translocase (flippase type)                     | 1.014 | P | A | A | A | A | M | A |   |   | 0.594 | P     | A | A | A | P | A | A |   |   |   |
| 1029842 | COG4708S    | gbs0867 |       | Hypothetical                    |                                                                   | Hypothetical membrane spanning protein                                           | 1.015 | P | P | P | P | P | P | P |   |   | 0.508 | P     | A | P | A | P | P | A |   |   |   |
| 1029844 | COG0272L    | gbs0868 | lig   | Cellular processes              | DNA replication, recombination and repair                         | NAD-dependent DNA ligase (EC 6.5.1.2)                                            | 1.078 | P | A | A | A | A | A | A |   |   | 1.358 | P     | A | A | A | A | A | A | A |   |   |
| 1029843 | COG1597R    | gbs0869 |       | Metabolism and transport        | Fatty acid and phospholipids                                      | Dialcylglycerol kinase family protein                                            | 1.305 | P | A | P | P | P | P | P |   |   | 1.433 | P     | P | P | A | P | P | A |   |   |   |
| 1029853 | COG1523G    | gbs0870 |       | Metabolism and transport        | Carbohydrates, organic alcohols, and acids                        | Pullulanase (EC 3.2.1.41)                                                        | 1.337 | P | A | P | M | M | A | A |   |   | 1.650 | P     | A | P | A | M | M | A |   |   |   |
| 1029852 | COG0296G    | gbs0871 |       | Metabolism and transport        | Carbohydrates, organic alcohols, and acids                        | 1,4-alpha-glucan branching enzyme (EC 2.4.1.18)                                  | 1.056 | P | P | P | P | P | P | P |   |   | 1.269 | P     | P | P | P | P | P | P |   |   |   |
| 1029849 | COG0448G    | gbs0872 | glgC  | Metabolism and transport        | Carbohydrates, organic alcohols, and acids                        | Glucose-1-phosphate adenylyltransferase catalytic subunit (EC 2.7.7.27)          | 0.800 | P | P | P | P | P | P | P |   |   | 1.219 | P     | P | P | P | P | P | P |   |   |   |
| 1029851 | COG0448G    | gbs0873 |       | Metabolism and transport        | Carbohydrates, organic alcohols, and acids                        | Glucose-1-phosphate adenylyltransferase regulatory subunit (EC 2.7.7.27)         | 0.805 | P | P | P | P | P | P | P |   |   | 1.154 | P     | P | P | P | P | P | P |   |   |   |
| 1029850 | COG0297G    | gbs0874 |       | Metabolism and transport        | Carbohydrates, organic alcohols, and acids                        | Glycogen synthase (EC 2.4.1.21)                                                  | 1.294 | P | P | P | P | P | P | P |   |   | 1.159 | P     | P | P | P | P | P | P |   |   |   |
| 1029854 | -           | gbs0875 | atpE  | Metabolism and transport        | Energy production and conversion                                  | ATP synthase C chain (EC 3.6.3.14)                                               | 1.114 | P | P | P | P | P | P | P |   |   | 0.884 | P     | M | P | P | P | P | P |   |   |   |
| 1029856 | -           | gbs0876 | atpB  | Metabolism and transport        | Energy production and conversion                                  | ATP synthase A chain (EC 3.6.3.14)                                               | 1.806 | P | P | P | P | P | P | P |   |   | 1.295 | P     | P | P | P | P | P | P |   |   |   |
| 1029857 | COG0711C    | gbs0877 | atpF  | Metabolism and transport        | Energy production and conversion                                  | ATP synthase B chain (EC 3.6.3.14)                                               | 1.859 | P | P | P | P | P | P | P |   |   | 1.220 | P     | P | P | P | P | P | P |   |   |   |
| 1029859 | COG0712C    | gbs0878 | atpH  | Metabolism and transport        | Energy production and conversion                                  | ATP synthase delta chain (EC 3.6.3.14)                                           | 2.636 | P | P | P | P | P | P | P |   |   | 1.406 | P     | P | P | P | P | P | P |   |   |   |
| 1029855 | COG0056C    | gbs0879 | atpA  | Metabolism and transport        | Energy production and conversion                                  | ATP synthase alpha chain (EC 3.6.3.14)                                           | 1.646 | P | P | P | P | P | P | P |   |   | 1.389 | P     | P | P | P | P | P | P |   |   |   |
| 1029865 | COG0224C    | gbs0880 | atpG  | Metabolism and transport        | Energy production and conversion                                  | ATP synthase gamma chain (EC 3.6.3.14)                                           | 1.841 | P | P | P | P | P | P | P |   |   | 1.358 | P     | P | P | P | P | P | P |   |   |   |
| 1029858 | COG0055C    | gbs0881 | atpD  | Metabolism and transport        | Energy production and conversion                                  | ATP synthase beta chain (EC 3.6.3.14)                                            | 1.499 | P | P | P | P | P | P | P |   |   | 1.273 | P     | P | P | P | P | P | P |   |   |   |
| 1029863 | -           | gbs0882 | atpC  | Metabolism and transport        | Energy production and conversion                                  | ATP synthase epsilon chain (EC 3.6.3.14)                                         | 1.093 | P | P | P | P | P | P | P |   |   | 0.962 | P     | P | P | P | P | P | P |   |   |   |
| 1029866 | COG0766M    | gbs0883 | murA  | Cell Envelope                   | Biosynthesis and degradation of murein sacculus and peptidoglycan | UDP-N-acetylglucosamine 1-carboxyvinyltransferase (EC 2.5.1.7)                   | 1.551 | P | P | P | A | P | P | P |   |   | 0.965 | P     | A | P | M | P | P | P | M |   |   |
| 1029867 | -           | gbs0884 | eupA  | General function predicted only |                                                                   | EupA protein                                                                     | 0.868 | P | P | P | A | P | P | P |   |   | 0.591 | P     | A | P | A | P | A |   |   |   |   |
| 1029861 | -           | gbs0885 | endA  | Cellular processes              | DNA transformation                                                | DNA-entry nuclease (EC 3.1.30.-)                                                 | 3.358 | P | A | A | M | A | A | A |   |   | 1.672 | P     | A | A | A | A | A | A |   |   |   |
| 1029860 | COG0016J    | gbs0886 | pheS  | Cellular processes              | Transcription, ribosomal structure and biogenesis                 | Phenylalanyl-tRNA synthetase alpha chain (EC 6.1.1.20)                           | 1.710 | P | P | P | P | P | P | P |   |   | 1.272 | P     | A | A | A | P | P | A |   |   |   |
| 1029864 | -           | gbs0887 | pheT  | Metabolism and transport        | Central intermediary metabolism                                   | Acetyltransferase, GNAT family                                                   | 1.665 | P | P | P | P | P | P | P |   |   | 1.328 | P     | A | A | A | P | M | A |   |   |   |
| 1029872 | 0072J, COG0 | gbs0888 | pheT  | Cellular processes              | Transcription, ribosomal structure and biogenesis                 | Phenylalanyl-tRNA synthetase beta chain (EC 6.1.1.20)                            | 1.421 | P | P | P | P | P | P | P |   |   | 0.882 | P     | P | P | P | P | P |   |   |   |   |
| 1029871 | COG3857L    | gbs0890 | rexB  | Cellular processes              | DNA replication, recombination and repair                         | ATP-dependent nuclease subunit B                                                 | 1.218 | P | A | A | P | A | A | A |   |   | 1.794 | P     | A | A | A | A | A | A |   |   |   |
| 1029875 | COG1074L    | gbs0891 | rexA  | Cellular processes              | DNA replication, recombination and repair                         | ATP-dependent nuclease subunit A                                                 | 1.059 | M | A | A | A | A | A | A |   |   | 0.846 | M     | A | A | A | A | A | A |   |   |   |
| 1029873 | COG0598P    | gbs0892 |       | Metabolism and transport        | Inorganic ion transport and metabolism                            | Magnesium and cobalt transport protein corA                                      | 4.120 | A | A | A | A | A | A | A |   |   | 3.541 | P     | A | A | A | A | A | A |   |   |   |
| 1029874 | COG0486R    | gbs0893 | thdF  | Cellular processes              | Transcription, ribosomal structure and biogenesis                 | tRNA (5-carboxymethylaminomethyl-2-thiouridylyl) synthase                        | 1.441 | P | M | P | P | P | P | P |   |   | 0.583 | P     | P | A | A | P | A |   |   |   |   |
| 1029870 | COG0488R    | gbs0894 |       | Transport and binding proteins  | Unknown substrate                                                 | ABC transporter ATP-binding protein                                              | 3.672 | P | A | A | A | A | A | A |   |   | 2.327 | P     | A | P | A | A | A | A |   |   |   |
| 1029869 | COG1071C    | gbs0895 | acoA  | Metabolism and transport        | Energy production and conversion                                  | Pyruvate dehydrogenase E1 component alpha subunit (EC 1.2.4.1)                   | 0.713 | P | P | P | P | P | P | P |   |   | 0.695 | P     | P | P | P | P | P |   |   |   |   |
| 1029876 | COG0022C    | gbs0896 | acoB  | Metabolism and transport        | Energy production and conversion                                  | Pyruvate dehydrogenase E1 component beta subunit (EC 1.2.4.1)                    | 0.963 | P | P | P | P | P | P | P |   |   | 0.724 | P     | P | P | P | P | P |   |   |   |   |
| 1029878 | COG0508C    | gbs0897 | acoC  | Metabolism and transport        | Energy production and conversion                                  | Dihydropyrimidine acetyltransferase component of pyruvate dehydrogenase complex  | 1.321 | P | P | P | P | P | P | P |   |   | 0.909 | P     | P | P | P | P | P |   |   |   |   |
| 1029879 | COG1249C    | gbs0898 | acoL  | Metabolism and transport        | Energy production and conversion                                  | Dihydropyrimidine dehydrogenase (EC 1.8.1.4)                                     | 1.112 | P | P | P | P | P | P | P |   |   | 0.905 | P     | P | P | P | P | P |   |   |   |   |
| 1029885 | COG0095H    | gbs0899 | lipB  | Metabolism and transport        | Cofactors, prosthetic groups, and carriers                        | Lipoate-protein ligase A (EC 6.3.2.-)                                            | 1.702 | P | P | P | A | P | P | P |   |   | 1.290 | P     | P | P | P | P | P |   |   |   |   |
| 1029877 | COG3442R    | gbs0900 |       | General function predicted only |                                                                   | CobB CobQ-like glutamine amidotransferase domain                                 | 1.382 | P | P | P | P | P | P | P |   |   | 1.117 | P     | A | P | A | P | P |   |   |   |   |
| 1029887 | COG0769M    | gbs0901 |       | Cell Envelope                   | Biosynthesis and degradation of murein sacculus and peptidoglycan | UDP-N-acetylmuramoylalanine-D-glutamate-2,6-diaminopimelate ligase (EC 6.3.2.-)  | 2.137 | P | M | A | A | P | M | P | A |   |       | 0.719 | P | A | A | A | A | A | A |   |   |
| 1029881 | -           | gbs0902 |       | Hypothetical                    |                                                                   | Hypothetical membrane spanning protein                                           | 0.666 | P | P | P | P | P | P | P |   |   | 1.068 | P     | P | P | P | P | P |   |   |   |   |
| 1029884 | COG4856S    | gbs0903 |       | Hypothetical                    |                                                                   | Hypothetical membrane associated protein                                         | 0.646 | P | P | P | P | P | P | P |   |   | 1.063 | P     | P | P | P | P | P |   |   |   |   |
| 1029882 | COG1109G    | gbs0904 | fermD | Metabolism and transport        | Carbohydrates, organic alcohols, and acids                        | Phosphoglucosamine mutase (EC 5.4.2.10)                                          | 1.067 | P | P | P | P | P | P | P |   |   |       |       |   |   |   |   |   |   |   |   |   |



|         |             |         |       |                                      |                                                              |                                                                                  |        |   |   |   |   |   |   |   |       |        |   |   |   |   |   |   |   |   |   |
|---------|-------------|---------|-------|--------------------------------------|--------------------------------------------------------------|----------------------------------------------------------------------------------|--------|---|---|---|---|---|---|---|-------|--------|---|---|---|---|---|---|---|---|---|
| 1030073 | -           | gbs1071 |       | Hypothetical                         |                                                              | Hypothetical protein                                                             | 12.675 | P | A | P | A | P | P | A | A     | 17.038 | P | A | A | A | A | A | A | A | A |
| 1030071 | -           | gbs1072 |       | Hypothetical                         |                                                              | Hypothetical protein                                                             | 7.790  | P | P | P | P | P | P | P | P     | 6.331  | P | A | P | A | A | M | A | A | A |
| 1030077 | COG1511S    | gbs1073 |       | Mobile and extrachromosomal elements |                                                              | Phage infection protein                                                          | 3.680  | P | P | P | P | P | P | P | P     | 3.647  | P | A | A | A | A | A | A | A | A |
| 1030076 | COG4842S    | gbs1074 |       | Hypothetical                         |                                                              | Hypothetical protein                                                             | 2.494  | P | P | P | P | P | P | P | P     | 6.520  | P | A | P | A | A | P | A | A | A |
| 1030074 | COG5153U    | gbs1075 |       | Hypothetical                         |                                                              | Hypothetical cytosolic protein                                                   | 5.007  | P | P | P | P | P | P | P | P     | 9.794  | P | A | P | A | P | P | A | M |   |
| 1030082 | -           | gbs1076 |       | Hypothetical                         |                                                              | Hypothetical secreted protein                                                    | 3.703  | P | P | P | P | P | P | P | P     | 8.187  | P | A | P | A | M | P | A | P |   |
| 1030084 | COG0458EF   | gbs1077 | carB  | Metabolism and transport             | Purines, pyrimidines, nucleosides, and nucleotides           | Carbamoyl-phosphate synthase large chain (EC 6.3.5.5)                            | 2.112  | P | P | P | P | P | P | P | P     | 2.226  | P | P | A | P | P | P | P | P |   |
| 1030081 | COG0505EF   | gbs1078 | carA  | Metabolism and transport             | Purines, pyrimidines, nucleosides, and nucleotides           | Carbamoyl-phosphate synthase small chain (EC 6.3.5.5)                            | 1.940  | P | P | P | P | P | P | P | P     | 2.707  | P | A | P | A | P | P | A | M |   |
| 1030083 | COG0540F    | gbs1079 | pyrB  | Metabolism and transport             | Purines, pyrimidines, nucleosides, and nucleotides           | Aspartate carbamoyltransferase (EC 2.1.3.2)                                      | 1.982  | P | P | P | P | P | P | P | P     | 1.421  | P | A | P | P | P | P | P | P |   |
| 1030072 | COG0044F    | gbs1080 | pyrC  | Metabolism and transport             | Purines, pyrimidines, nucleosides, and nucleotides           | Dihydroorotase (EC 3.5.2.3)                                                      | 1.200  | P | P | P | P | P | P | P | P     | 1.285  | P | A | P | M | P | P | P | P |   |
| 1030087 | COG0461F    | gbs1081 | pyrE  | Metabolism and transport             | Purines, pyrimidines, nucleosides, and nucleotides           | Orotate phosphoribosyltransferase (EC 2.4.2.10)                                  | 1.549  | P | P | P | P | P | P | P | P     | 0.885  | P | A | P | A | P | P | P | P |   |
| 1030080 | COG0284F    | gbs1082 | pyrF  | Metabolism and transport             | Purines, pyrimidines, nucleosides, and nucleotides           | Orotidine 5-phosphate decarboxylase (EC 4.1.1.23)                                | 1.662  | P | P | P | P | P | P | P | P     | 1.056  | P | P | P | P | P | P | P | P |   |
| 1030085 | Z966S, COG3 | gbs1083 |       | Transport and binding proteins       | Unknown substrate                                            | Threonine Serine Exporter                                                        | 1.729  | P | P | P | A | P | P | A | A     | 1.026  | P | A | P | A | A | M | A | M | A |
| 1030093 | COG0488R    | gbs1084 |       | Transport and binding proteins       | Unknown substrate                                            | ABC transporter ATP-binding protein                                              | 3.350  | P | A | A | A | A | A | A | A     | 1.778  | P | A | A | A | A | A | A | A | A |
| 1030086 | COG1328F    | gbs1085 | mhB   | Metabolism and transport             | Purines, pyrimidines, nucleosides, and nucleotides           | Anaerobic ribonucleoside-triphosphate reductase (EC 1.17.4.2)                    | 0.463  | P | A | A | A | P | P | P | P     | 0.627  | P | A | P | P | P | P | P | P |   |
| 1030088 | COG0136E    | gbs1086 |       | Metabolism and transport             | Amino acids, peptides, aminosugars and amines                | Aspartate-semialdehyde dehydrogenase (EC 1.2.1.11)                               | 2.738  | P | P | P | P | P | P | P | P     | 4.794  | P | A | P | A | A | P | A | P |   |
| 1030097 | -           | gbs1087 | ftsA  | Hypothetical                         |                                                              | LPXTG Hypothetical protein                                                       | 0.654  | P | P | P | P | P | P | P | P     | 2.824  | P | A | P | P | P | P | P | P |   |
| 1030090 | COG1502I    | gbs1088 |       | Metabolism and transport             | Fatty acid and phospholipids                                 | Cardiolipin synthetase (EC 2.7.8.-)                                              | 1.452  | P | P | P | P | P | P | P | P     | 1.390  | P | A | P | A | M | P | M | A |   |
| 1030094 | COG2759F    | gbs1089 | fts.1 | Metabolism and transport             | Purines, pyrimidines, nucleosides, and nucleotides           | Formate-tetrahydrofolate ligase (EC 6.3.4.3)                                     | 0.885  | P | P | P | P | P | P | P | P     | 0.737  | P | A | P | P | P | P | P | P |   |
| 1030091 | COG0095H    | gbs1090 | lplA  | Metabolism and transport             | Cofactors, prosthetic groups, and carriers                   | Lipoate-protein ligase A (EC 6.3.2.-)                                            | 2.747  | P | A | P | A | P | A | A | A     | 0.959  | P | A | M | A | A | M | A | M | A |
| 1030092 | COG0846K    | gbs1091 |       | Cellular processes                   | Transcription                                                | SIR2 family protein                                                              | 4.364  | P | A | P | A | P | P | P | A     | 1.059  | P | A | P | A | A | P | P | P |   |
| 1030095 | -           | gbs1092 |       | Cellular processes                   | Posttranslational modification, protein turnover, chaperones | ATPase associated with chromosome architecture replication                       | 2.398  | P | M | M | A | P | P | P | A     | 0.837  | P | A | P | A | P | P | A | A |   |
| 1030102 | COG0509E    | gbs1093 |       | Metabolism and transport             | Amino acids, peptides, aminosugars and amines                | Glycine cleavage system H protein                                                | 2.531  | P | P | P | A | P | P | P | P     | 0.983  | P | M | P | A | P | P | A | A |   |
| 1030100 | COG2141C    | gbs1094 |       | Metabolism and transport             | Energy production and conversion                             | Luciferase-like monooxygenase (EC 1.14.-.-)                                      | 3.564  | P | A | A | A | A | A | A | A     | 0.667  | P | A | P | A | A | A | P | A |   |
| 1030096 | COG1902C    | gbs1095 |       | Metabolism and transport             | Energy production and conversion                             | Probable NADH-dependent flavin oxidoreductase yqiG (EC 1.-.-.-)                  | 2.311  | P | A | A | A | A | A | A | A     | 0.734  | P | A | A | A | A | A | A | A |   |
| 1030101 | COG0095H    | gbs1096 |       | Metabolism and transport             | Cofactors, prosthetic groups, and carriers                   | Lipoate-protein ligase A (EC 6.3.2.-)                                            | 3.355  | P | A | P | A | P | P | A | P     | 0.914  | P | A | P | A | P | P | M | A |   |
| 1030107 | COG0452H    | gbs1097 | dpfB  | Metabolism and transport             | Cofactors, prosthetic groups, and carriers                   | Phosphopantothenate-cysteine ligase (EC 6.3.2.5)                                 | 2.984  | P | A | A | A | A | A | A | A     | 1.439  | P | A | A | A | A | A | P | A |   |
| 1030103 | COG0452H    | gbs1098 | dfp   | Metabolism and transport             | Cofactors, prosthetic groups, and carriers                   | Phosphopantothencysteine decarboxylase (EC 4.1.1.36)                             | 1.478  | P | A | M | A | P | P | A | M     | 0.719  | P | A | A | A | A | A | A | A |   |
| 1030098 | COG4684S    | gbs1099 |       | Hypothetical                         |                                                              | Integral membrane protein                                                        | 1.861  | P | P | P | P | P | P | P | P     | 1.050  | P | A | P | P | P | P | P | P |   |
| 1030099 | COG1109G    | gbs1100 | pgmA  | Metabolism and transport             | Carbohydrates, organic alcohols, and acids                   | Phosphoglucomutase (EC 5.4.2.2) Phosphomannomutase (EC 5.4.2.8)                  | 0.781  | P | P | P | P | P | P | P | P     | 1.166  | P | M | P | A | P | P | P | P |   |
| 1030108 | -           | gbs1101 |       | Hypothetical                         |                                                              | Hypothetical protein                                                             | 2.816  | P | P | P | A | P | P | P | M     | 1.378  | P | A | P | A | P | P | A | P |   |
| 1030115 | COG1132V    | gbs1102 |       | Cellular processes                   | Toxin production and resistance                              | Multidrug protein lipid ABC transporter family, ATP-binding and permease protein | 2.821  | P | A | A | A | P | A | A | A     | 1.748  | P | A | A | A | A | A | A | A | A |
| 1030106 | COG1132V    | gbs1103 |       | Cellular processes                   | Toxin production and resistance                              | Multidrug resistance ABC transporter ATP-binding and permease protein            | 2.541  | P | A | A | A | A | A | A | A     | 1.613  | P | A | A | A | A | A | A | A | A |
| 1030105 | -           | gbs1104 |       | Hypothetical                         |                                                              | Antigen                                                                          | 2.708  | P | A | P | A | P | P | A | P     | 1.697  | P | A | P | A | P | P | A | A |   |
| 1030119 | -           | gbs1105 |       | Hypothetical                         |                                                              | Hypothetical protein                                                             | 3.144  | P | P | P | A | P | P | P | A     | 3.545  | P | A | A | A | P | A | A | A |   |
| 1030114 | COG0112E    | gbs1106 | glyA  | Metabolism and transport             | Amino acids, peptides, aminosugars and amines                | Serine hydroxymethyltransferase (EC 2.1.2.1)                                     | 2.088  | P | P | P | P | P | P | P | P     | 1.616  | P | A | P | A | P | P | P | P |   |
| 1030116 | COG0009J    | gbs1107 |       | Cellular processes                   | Translation, ribosomal structure and biogenesis              | Sua5 YciO YrdC YwlC family protein                                               | 2.104  | P | P | P | P | P | P | P | P     | 1.318  | P | A | P | A | P | P | P | P |   |
| 1030111 | COG2890J    | gbs1108 | hemK  | Cellular processes                   | Translation, ribosomal structure and biogenesis              | Peptide release factor-glutamine N5-methyltransferase (EC 2.1.1.-)               | 2.652  | P | P | P | P | P | P | P | P     | 1.883  | P | A | P | P | P | P | P | P |   |
| 1030109 | COG0216J    | gbs1109 | prfA  | Cellular processes                   | Translation, ribosomal structure and biogenesis              | Bacterial Peptide Chain Release Factor 1 (RF-1)                                  | 2.230  | P | P | M | P | P | P | P | P     | 2.418  | P | A | P | A | A | A | A | A |   |
| 1030113 | COG1435F    | gbs1110 | tdk2  | Metabolism and transport             | Purines, pyrimidines, nucleosides, and nucleotides           | Thymidine kinase (EC 2.7.1.21)                                                   | 1.952  | P | P | P | P | P | P | P | P     | 1.323  | P | A | P | P | P | P | P | P |   |
| 1030117 | COG1942R    | gbs1111 |       | Metabolism and transport             | Energy production and conversion                             | 4-oxalocrotonate tautomerase (EC 5.3.2.-)                                        | 0.373  | P | P | P | P | P | P | P | P     | 0.240  | P | P | A | P | A | M | A |   |   |
| 1030118 | -           | gbs1112 | apbE  | Metabolism and transport             | Cofactors, prosthetic groups, and carriers                   | Iron-sulfur cluster assembly repair protein ApbE                                 | 1.213  | P | P | P | P | P | P | P | P     | 2.348  | P | A | P | P | P | P | P | P |   |
| 1030120 | COG0431R    | gbs1113 |       | Metabolism and transport             | Central intermediary metabolism                              | NADPH-dependent FMN reductase family protein                                     | 0.689  | P | P | P | P | P | P | P | P     | 1.790  | P | A | P | P | P | P | P | P |   |
| 1030123 | 0431R, COG2 | gbs1114 |       | Metabolism and transport             | Central intermediary metabolism                              | Oxidoreductase (EC 1.1.1.-)                                                      | 0.751  | P | M | P | P | P | P | A | P     | 2.624  | P | A | P | P | P | P | P | P |   |
| 1030125 | COG2116P    | gbs1115 |       | Metabolism and transport             | Inorganic ion transport and metabolism                       | Formate nitrite transporter family protein                                       | 1.177  | P | M | P | P | P | P | M | P     | 1.447  | P | A | P | P | P | P | P | P |   |
| 1030122 | COG2233F    | gbs1116 |       | Metabolism and transport             | Purines, pyrimidines, nucleosides, and nucleotides           | Xanthine permease                                                                | 1.328  | P | P | P | P | P | P | P | P     | 0.899  | P | A | P | P | P | M | P | P |   |
| 1030114 | COG0503F    | gbs1117 | xpt   | Metabolism and transport             | Purines, pyrimidines, nucleosides, and nucleotides           | Xanthine phosphoribosyltransferase (EC 2.4.2.-)                                  | 1.167  | P | P | P | A | P | M | P | 0.680 | P      | A | M | A | A | P | A | A |   |   |
| 1030130 | -           | gbs1118 |       | Hypothetical                         |                                                              | Hypothetical protein                                                             | 1.510  | A | A | A | A | A | A | A | A     | 0.291  | A | A | A | A | A | A | A | A |   |
| 1030126 | -           | gbs1119 |       | Hypothetical                         |                                                              | hypothetical phage protein                                                       | 0.951  | P | A | A | A | A | A | A | A     | 0.782  | P | A | A | A | A | A | A | A |   |
| 1030127 | 0863L, COG1 | gbs1120 |       | Cellular processes                   | DNA replication, recombination and repair                    | Chromosome partitioning protein parB Adenine-specific methyltransferase (EC 2.   | 0.455  | A | A | A | A | A | A | A | A     | 0.265  | A | A | A | A | A | A | A | A |   |
| 1030132 | COG3843U    | gbs1121 |       | General function predicted only      |                                                              | Relaxase                                                                         | 0.153  | A | A | A | A | A | A | A | A     | 0.099  | A | A | A | A | A | A | A | A |   |
| 1030128 | -           | gbs1122 |       | Mobile and extrachromosomal elements |                                                              | Mobilisation protein                                                             | 0.269  | A | A | A | A | A | A | A | A     | 0.054  | A | A | A | A | A | A | A | A |   |
| 1030133 | -           | gbs1123 |       | Hypothetical                         |                                                              | Hypothetical protein                                                             | 0.339  | A | A | A | A | A | A | A | A     | 0.070  | A | A | A | A | A | A | A | A |   |
| 1030129 | -           | gbs1124 |       | Hypothetical                         |                                                              | Hypothetical protein                                                             | 0.476  | A | A | A | A | A | A | A | A     | 0.410  | A | A | A | A | A | A | A | A |   |
| 1030135 | -           | gbs1125 |       | Hypothetical                         |                                                              | Hypothetical protein                                                             | 0.148  | A | A | A | A | A | A | A | A     | 0.091  | A | A | A | A | A | A | A | A |   |
| 1030134 | -           | gbs1126 |       | General function predicted only      |                                                              | LtrC-like protein                                                                | 0.318  | A | A | A | A | A | A | A | A     | 0.347  | A | A | A | A | A | A | A | A |   |
| 1030137 | -           | gbs1127 |       | Hypothetical                         |                                                              | Hypothetical protein                                                             | 0.910  | A | A | A | A | A | A | A | A     | 0.288  | A | A | A | A | A | A | A | A |   |
| 1030131 | COG3505U    | gbs1128 |       | Mobile and extrachromosomal elements |                                                              | TraG TraD family                                                                 | 0.197  | A | A | A | A | A | A | A | A     | 0.126  | A | A | A | A | A | A | A | A |   |
| 1030141 | -           | gbs1129 |       | Hypothetical                         |                                                              | Hypothetical protein                                                             | 0.246  | A | A | A | A | A | A | A | A     | 0.463  | A | A | A | A | A | A | A | A |   |
| 1030138 | -           | gbs1130 |       | Hypothetical                         |                                                              | Hypothetical protein                                                             | 0.604  | A | A | A | A | A | A | A | A     | 0.634  | A | A | A | A | A | A | A | A |   |
| 1030143 | -           | gbs1131 |       | Hypothetical                         |                                                              | Hypothetical protein                                                             | 0.335  | A | A | A | A | M | A | A | A     | 0.698  | A | A | A | A | A | A | A | A |   |
| 1030142 | -           | gbs1132 |       | Hypothetical                         |                                                              | Hypothetical protein                                                             | 0.304  | A | A | A | A | A | A | A | A     | 0.103  | A | A | A | A | A | A | A | A |   |
| 1030145 | COG3942R    | gbs1133 |       | Hypothetical                         |                                                              | Hypothetical protein                                                             | 0.497  | A | A | A | A | A | A | A | A     | 0.325  | A | A | A | A | A | A | A | A |   |
| 1030140 | -           | gbs1134 |       | Hypothetical                         |                                                              | Hypothetical protein                                                             | 1.183  | P | A | A | A | A | A | A | A     | 0.852  | A | A | A | A | A | A | A | A |   |
| 1030146 | COG3451U    | gbs1135 |       | Hypothetical                         |                                                              | TRSE PROTEIN                                                                     | 0.484  | A | A | A | A | A | A | A | A     | 0.127  | A | A | A | A | A | A | A | A |   |
| 1030150 | -           | gbs1136 |       | Hypothetical                         |                                                              | Hypothetical protein                                                             | 0.352  | P | A | P | P | P | P | M | A     | 0.312  | M | A | A | A | A | P | A | A |   |
| 1030147 | -           | gbs1137 |       | Hypothetical                         |                                                              | Hypothetical protein                                                             | 0.678  | A | A | M | A | P | A | A | A     | 0.327  | A | A | A | A | A | A | A | A |   |
| 1030139 | -           | gbs1138 |       | Hypothetical                         |                                                              | Hypothetical protein                                                             | 0.493  | A | A | A | A | A | A | A | A     | 1.047  | A | A | A | A | A | A | A | A |   |
| 1030151 | -           | gbs1139 |       | Hypothetical                         |                                                              |                                                                                  |        |   |   |   |   |   |   |   |       |        |   |   |   |   |   |   |   |   |   |



|         |             |         |        |                                      |                                               |                                                              |       |   |   |          |                                                    |       |   |       |          |                                                    |       |       |   |   |   |   |   |   |   |   |   |   |
|---------|-------------|---------|--------|--------------------------------------|-----------------------------------------------|--------------------------------------------------------------|-------|---|---|----------|----------------------------------------------------|-------|---|-------|----------|----------------------------------------------------|-------|-------|---|---|---|---|---|---|---|---|---|---|
| 1030285 | COG1293K    | gbs1263 | fbp    | Cell Envelope                        | Other                                         | Fibronectin-binding protein                                  | 1.432 | P | P | P        | P                                                  | P     | P | P     | P        | P                                                  | P     | 1.747 | P | A | A | A | A | A | A | A | A |   |
| 1030284 | COG3527Q    | gbs1264 |        | Metabolism and transport             | Secondary metabolites                         | Alpha-acetolactate decarboxylase (EC 4.1.1.5)                | 1.584 | P | P | P        | P                                                  | P     | P | P     | P        | P                                                  | P     | 1.543 | P | P | P | P | P | P | P | P | P |   |
| 1030291 | COG0028EH   | gbs1265 |        | Metabolism and transport             | Amino acids, peptides, aminosugars and amines | Acetolactate synthase (EC 2.2.1.6)                           | 0.949 | P | P | P        | P                                                  | P     | P | P     | P        | P                                                  | P     | 0.869 | P | P | P | P | P | P | P | P | P |   |
| 1030293 | -           | gbs1266 |        | Hypothetical                         |                                               | Tetratricopeptide repeat family protein                      | 2.186 | P | A | P        | A                                                  | P     | A | P     | A        | P                                                  | A     | 1.463 | P | A | A | A | A | P | A | A | A |   |
| 1030289 | COG0628R    | gbs1267 |        | Hypothetical                         |                                               | Hypothetical membrane spanning protein                       | 1.848 | P | M | P        | P                                                  | P     | P | P     | P        | P                                                  | P     | 0.985 | P | A | P | A | P | P | P | P | P |   |
| 1030295 | COG0494LR   | gbs1268 |        | Cellular processes                   | DNA replication, recombination and repair     | Phosphohydrolase (MutT nudix family protein)                 | 1.329 | P | P | P        | A                                                  | M     | P | A     | A        | A                                                  | 0.809 | P     | A | A | A | A | M | A | A | A | A |   |
| 1030296 | COG0494LR   | gbs1269 |        | General function predicted only      |                                               | 7,8-dihydro-8-oxoguanine-triphosphatase (EC 3.6.1.-)         | 1.162 | P | D | P        | P                                                  | P     | P | P     | P        | P                                                  | 1.002 | P     | A | P | A | P | M | P | P | P |   |   |
| 1030294 | -           | gbs1270 | hylB/A | General function predicted only      |                                               | Hyaluronate lyase precursor (EC 4.2.2.1)                     | 1.027 | P | A | P        | A                                                  | A     | A | P     | A        | P                                                  | A     | 0.903 | P | A | A | A | A | P | A | P | A |   |
| 1030292 | COG1088M    | gbs1271 | cpsF/Q | Metabolism and transport             |                                               | Carbohydrates, organic alcohols, and acids                   | 1.120 | P | P | P        | A                                                  | P     | P | P     | P        | P                                                  | 1.363 | P     | A | P | M | A | P | P | A | P | A |   |
| 1030299 | COG1898M    | gbs1272 | rmlC   | Metabolism and transport             |                                               | Carbohydrates, organic alcohols, and acids                   | 1.200 | P | P | P        | P                                                  | P     | P | P     | P        | P                                                  | 1.302 | P     | P | P | P | P | P | P | P | P | P |   |
| 1030298 | COG1209M    | gbs1273 | rmlA   | Metabolism and transport             |                                               | Carbohydrates, organic alcohols, and acids                   | 0.877 | P | P | P        | P                                                  | P     | P | P     | P        | P                                                  | 1.222 | P     | P | P | M | P | P | P | P | P | P |   |
| 1030300 | COG0665E    | gbs1274 |        | Metabolism and transport             |                                               | Amino acids, peptides, aminosugars and amines                | 2.082 | P | A | A        | A                                                  | A     | A | A     | A        | A                                                  | 1.306 | P     | A | A | A | A | A | A | A | A | A |   |
| 1030297 | COG0327S    | gbs1275 |        | General function predicted only      |                                               | NIF3-related protein                                         | 1.173 | P | M | P        | A                                                  | P     | P | A     | M        | 1.058                                              | P     | A     | A | A | A | P | A | P | A | P | A |   |
| 1030303 | COG2384R    | gbs1276 |        | Hypothetical                         |                                               | Hypothetical cytosolic protein                               | 2.067 | P | M | P        | P                                                  | P     | P | P     | P        | 1.030                                              | P     | A     | P | A | A | P | A | P | A | P | A |   |
| 1030302 | COG3935L    | gbs1277 | dnaD   | Cellular processes                   | DNA replication, recombination and repair     | DNA replication protein dnaD                                 | 5.373 | P | A | A        | A                                                  | A     | A | A     | A        | 1.168                                              | P     | A     | A | A | A | A | A | A | A | A | A |   |
| 1030304 | COG0503F    | gbs1278 | apt    | Metabolism and transport             |                                               | Purines, pyrimidines, nucleosides, and nucleotides           | 1.680 | P | P | P        | P                                                  | P     | P | P     | P        | 0.696                                              | P     | P     | P | P | P | P | P | P | P | P | P |   |
| 1030301 | -           | gbs1279 |        | Cell Envelope                        |                                               | M protein                                                    | 0.956 | P | P | P        | P                                                  | P     | P | P     | P        | 1.913                                              | P     | A     | P | P | P | P | P | P | P | P | P |   |
| 1030307 | COG0608L    | gbs1280 | recJ   | Cellular processes                   | DNA replication, recombination and repair     | Single-stranded-DNA-specific exonuclease recJ (EC 3.1.-)     | 1.900 | P | A | A        | A                                                  | A     | P | A     | P        | A                                                  | 0.838 | P     | A | M | A | A | M | A | A | A | A |   |
| 1030308 | COG0300R    | gbs1281 |        | Metabolism and transport             |                                               | Short chain dehydrogenase                                    | 1.615 | P | P | P        | P                                                  | P     | P | P     | P        | 0.910                                              | P     | M     | P | P | P | P | P | P | P | P | P |   |
| 1030306 | COG1234R    | gbs1282 | elaC   | Cellular processes                   |                                               | Transcription                                                | 1.452 | P | P | P        | P                                                  | P     | P | P     | P        | 0.976                                              | P     | P     | P | P | P | P | P | P | P | P | P |   |
| 1030305 | -           | gbs1283 |        | Metabolism and transport             |                                               | Carbohydrates, organic alcohols, and acids                   | 2.484 | P | P | P        | P                                                  | P     | P | P     | P        | 1.427                                              | P     | P     | P | P | P | P | P | P | P | P | P |   |
| 1030311 | COG2262R    | gbs1284 | hflX   | General function predicted only      |                                               | GTP-binding protein hflX                                     | 1.088 | P | P | P        | P                                                  | P     | P | P     | P        | 0.817                                              | P     | P     | P | P | P | P | P | P | P | P | P |   |
| 1030309 | COG0324J    | gbs1285 | miaA   | Cellular processes                   |                                               | Translation, ribosomal structure and biogenesis              | 0.511 | P | M | delta(2) | -isopentenylpyrophosphate transferase (EC 2.5.1.8) | 0.511 | P | M     | delta(2) | -isopentenylpyrophosphate transferase (EC 2.5.1.8) | 0.511 | P     | A | P | P | P | A | P | A | P | A | P |
| 1030310 | -           | gbs1286 |        | Hypothetical                         |                                               | Hypothetical protein                                         | 0.415 | P | P | P        | P                                                  | P     | P | P     | P        | 0.544                                              | P     | P     | P | P | P | P | P | P | P | P | P |   |
| 1030314 | COG1275P    | gbs1287 | exfA   | Hypothetical                         |                                               | Hypothetical membrane-spanning protein                       | 0.963 | P | A | A        | A                                                  | A     | A | A     | A        | 0.784                                              | P     | A     | P | A | P | A | A | P | A | A | A |   |
| 1030315 | COG1523G    | gbs1288 |        | Metabolism and transport             |                                               | Carbohydrates, organic alcohols, and acids                   | 0.335 | A | A | A        | A                                                  | P     | A | A     | A        | 1.747                                              | P     | P     | A | A | A | P | P | A | P | A | A |   |
| 1030313 | COG1387ER   | gbs1289 |        | Metabolism and transport             |                                               | Amino acids, peptides, aminosugars and amines                | 2.666 | P | A | P        | A                                                  | P     | A | A     | A        | 4.167                                              | P     | A     | A | A | A | A | A | A | A | A | A | A |
| 1030312 | COG1573L    | gbs1290 |        | Cellular processes                   |                                               | DNA replication, recombination and repair                    | 2.828 | P | P | P        | A                                                  | P     | M | P     | M        | 3.926                                              | P     | A     | M | A | A | A | A | A | A | A | A | A |
| 1030317 | COG0624E    | gbs1291 |        | Metabolism and transport             |                                               | Amino acids, peptides, aminosugars and amines                | 0.889 | P | P | P        | P                                                  | P     | P | P     | P        | 1.409                                              | P     | P     | P | P | P | P | P | P | P | P | P |   |
| 1030316 | COG0778C    | gbs1292 |        | Metabolism and transport             |                                               | Energy production and conversion                             | 1.131 | P | P | P        | P                                                  | P     | P | P     | P        | 1.916                                              | P     | P     | P | P | P | P | P | P | P | P | P |   |
| 1030319 | 0584C, COG4 | gbs1293 |        | Metabolism and transport             |                                               | Energy production and conversion                             | 1.584 | P | P | P        | M                                                  | M     | A | A     | P        | 0.534                                              | P     | A     | P | A | P | A | P | A | P | A | P | A |
| 1030322 | COG0322L    | gbs1294 | uvrC   | Cellular processes                   |                                               | DNA replication, recombination and repair                    | 2.123 | P | A | A        | A                                                  | A     | A | A     | A        | 1.111                                              | P     | A     | A | A | A | A | A | A | A | A | A | A |
| 1030320 | COG1636S    | gbs1295 |        | Hypothetical                         |                                               | Hypothetical cytosolic protein                               | 1.906 | M | A | A        | A                                                  | A     | A | A     | A        | 1.663                                              | A     | A     | A | A | A | A | A | A | A | A | A | A |
| 1030321 | COG0534V    | gbs1296 |        | Cellular processes                   |                                               | Toxin production and resistance                              | 1.789 | P | A | A        | A                                                  | A     | A | A     | A        | 1.135                                              | A     | A     | A | A | A | A | A | A | A | A | A | A |
| 1030318 | COG2764S    | gbs1297 |        | Metabolism and transport             |                                               | Energy production and conversion                             | 1.090 | P | P | P        | P                                                  | P     | P | P     | P        | 0.866                                              | P     | P     | P | P | P | P | P | P | P | P | P |   |
| 1030327 | -           | gbs1298 |        | Hypothetical                         |                                               | putohtical protein                                           | 2.300 | P | P | P        | P                                                  | P     | P | P     | P        | 0.890                                              | P     | P     | P | P | P | P | P | P | P | P | P | P |
| 1030325 | -           | gbs1299 |        | Mobile and extrachromosomal elements |                                               | PUTATIVE HOST CELL SURFACE-EXPOSED LIPOPROTEIN               | 2.618 | P | A | M        | A                                                  | P     | P | M     | A        | 1.645                                              | P     | A     | A | A | A | A | A | A | A | A | A | A |
| 1030323 | COG2801L    | gbs1301 |        | Mobile and extrachromosomal elements |                                               | Transposase                                                  | 0.273 | A | A | A        | A                                                  | A     | A | A     | A        | 0.162                                              | A     | A     | A | A | A | A | A | A | A | A | A | A |
| 1030324 | -           | gbs1302 |        | Mobile and extrachromosomal elements |                                               | Transposase                                                  | 1.035 | A | A | A        | A                                                  | A     | A | A     | A        | 0.126                                              | A     | A     | A | A | A | A | A | A | A | A | A | A |
| 1030329 | -           | gbs1306 |        | Mobile and extrachromosomal elements |                                               | Streptococcal histidine triad protein                        | 4.656 | A | A | A        | A                                                  | A     | A | A     | A        | 3.449                                              | A     | A     | A | A | A | A | A | A | A | A | A | A |
| 1030333 | COG0803P    | gbs1307 | lmb    | Metabolism and transport             |                                               | Inorganic ion transport and metabolism                       | 0.871 | P | A | A        | A                                                  | A     | A | A     | A        | 1.312                                              | P     | A     | A | A | A | M | A | A | A | A | A | A |
| 1030336 | COG1404O    | gbs1308 | scpB   | Cellular processes                   |                                               | Posttranslational modification, protein turnover, chaperones | 1.928 | P | M | P        | M                                                  | P     | P | P     | P        | 1.628                                              | P     | A     | P | M | M | P | A | P | A | P | A | P |
| 1030332 | COG2176L    | gbs1312 |        | Hypothetical                         |                                               | Hypothetical protein                                         | 4.233 | P | A | A        | A                                                  | A     | A | A     | A        | 1.294                                              | A     | A     | A | A | A | A | A | A | A | A | A | A |
| 1030342 | -           | gbs1313 |        | Hypothetical                         |                                               | Hypothetical protein                                         | 2.835 | P | P | A        | P                                                  | A     | P | M     | 0.689    | P                                                  | A     | P     | A | A | P | P | A | P | P | P | P | P |
| 1030339 | COG0582L    | gbs1314 |        | Mobile and extrachromosomal elements |                                               | DNA integration recombination inversion protein              | 1.160 | P | P | P        | P                                                  | P     | P | P     | P        | 2.731                                              | P     | P     | P | P | P | P | P | P | P | P | P | P |
| 1030338 | -           | gbs1315 |        | Hypothetical                         |                                               | Hypothetical protein                                         | 1.091 | P | P | P        | P                                                  | P     | P | P     | P        | 1.900                                              | P     | P     | P | P | P | P | P | P | P | P | P | P |
| 1030351 | -           | gbs1316 |        | Mobile and extrachromosomal elements |                                               | Replication protein                                          | 0.346 | M | A | A        | A                                                  | P     | M | A     | A        | 0.361                                              | A     | A     | A | A | A | A | A | A | A | A | A | A |
| 1030348 | -           | gbs1318 |        | Hypothetical                         |                                               | Hypothetical protein                                         | 0.152 | A | A | A        | A                                                  | A     | A | A     | A        | 0.141                                              | A     | A     | A | A | A | A | A | A | A | A | A | A |
| 1030343 | COG1674D    | gbs1320 |        | Cellular processes                   |                                               | Cell division                                                | 0.455 | A | A | A        | A                                                  | A     | A | A     | A        | 0.104                                              | A     | A     | A | A | A | A | A | A | A | A | A | A |
| 1030357 | -           | gbs1321 |        | Hypothetical                         |                                               | Hypothetical protein                                         | 0.435 | P | M | A        | P                                                  | A     | A | A     | A        | 0.113                                              | A     | A     | A | A | A | A | A | A | A | A | A | A |
| 1030354 | -           | gbs1322 |        | Hypothetical                         |                                               | Hypothetical protein                                         | 1.371 | P | A | A        | A                                                  | A     | A | A     | A        | 1.904                                              | P     | A     | A | A | A | A | A | A | A | A | A | A |
| 1030361 | -           | gbs1323 |        | Hypothetical                         |                                               | Hypothetical protein                                         | 1.624 | M | A | A        | A                                                  | A     | A | A     | A        | 1.165                                              | P     | A     | A | A | A | A | A | A | A | A | A | A |
| 1030353 | -           | gbs1324 | hsmD   | Mobile and extrachromosomal elements |                                               | TYPE II RESTRICTION-MODIFICATION SYSTEM MODIFICATION SUBUNIT | 0.375 | A | A | A        | A                                                  | A     | A | A     | A        | 0.220                                              | A     | A     | A | A | A | A | A | A | A | A | A | A |
| 1030364 | COG0582L    | gbs1325 |        | Mobile and extrachromosomal elements |                                               | DNA integration recombination inversion protein              | 1.225 | P | P | P        | P                                                  | P     | P | P     | P        | 1.977                                              | P     | P     | P | P | P | P | P | P | P | P | P | P |
| 1030363 | -           | gbs1326 |        | Hypothetical                         |                                               | Hypothetical protein                                         | 0.753 | P | P | P        | P                                                  | P     | P | P     | P        | 1.251                                              | P     | A     | P | A | P | P | A | P | A | P | A | P |
| 1030360 | COG1396K    | gbs1327 |        | Cellular processes                   |                                               | Transcriptional regulator, Cro CI family                     | 0.173 | A | A | A        | A                                                  | A     | A | A     | A        | 0.347                                              | A     | A     | A | A | A | A | A | A | A | A | A | A |
| 1030368 | COG2017G    | gbs1328 |        | Metabolism and transport             |                                               | Carbohydrates, organic alcohols, and acids                   | 0.445 | P | A | A        | A                                                  | P     | A | A     | P        | 0.567                                              | P     | A     | M | A | A | A | A | P | A | P | A | P |
| 1030367 | -           | gbs1329 | lacG   | Metabolism and transport             |                                               | Carbohydrates, organic alcohols, and acids                   | 0.642 | P | A | A        | A                                                  | A     | A | A     | A        | 2.211                                              | P     | A     | P | A | A | M | P | A | P | A | P | A |
| 1030369 | COG1455G    | gbs1330 | lacE   | Metabolism and transport             |                                               | Carbohydrates, organic alcohols, and acids                   | 0.368 | P | P | M        | M                                                  | P     | M | 2.344 | P        | A                                                  | P     | A     | P | A | P | P | P | P | P | P | P | P |
| 1030366 | -           | gbs1331 | lacF   | Metabolism and transport             |                                               | Carbohydrates, organic alcohols, and acids                   | 0.290 | A | A | P        | A                                                  | A     | M | A     | 2.756    | P                                                  | M     | P     | A | A | A | P | A | P | A | P | A | P |
| 1030373 | COG3711K    | gbs1332 |        | Cellular processes                   |                                               | Transcription                                                | 0.349 | P | A | A        | A                                                  | A     | P | A     | 3.539    | P                                                  | A     | M     | P | A | P | P | A | P | P | P | P | P |
| 1030371 | COG3684G    | gbs1333 | lacD.2 | Metabolism and transport             |                                               | Carbohydrates, organic alcohols, and acids                   | 0.400 | P | P | P        | P                                                  | P     | P | P     | 0.443    | P                                                  | M     | P     | P | P | P | P | P | P | P | P | P | P |
| 1030372 | COG1105G    | gbs1334 | lacC.2 | Metabolism and transport             |                                               | Carbohydrates, organic alcohols, and acids                   | 0.365 | A | A | A        | A                                                  | A     | A | A     | 1.022    | A                                                  | A     | A     | A | A | A | A | P | A | P | A | P | A |
| 1030370 | COG0698G    | gbs1335 | lacB.1 | Metabolism and transport             |                                               | Carbohydrates, organic alcohols, and acids                   | 0.547 | A | A | A        | A                                                  | A     | A | A     | 0.773    | P                                                  | A     | A     | A | A | A | A | A | A | A | A | A | A |
| 1030376 | COG0698G    | gbs1336 | lacA.2 | Metabolism and transport             |                                               | Carbohydrates, organic alcohols, and acids                   | 0.495 | P | A | A        | A                                                  | P     | M | A     | 0.960    | P                                                  | A     | A     | A | A | A | A | A | A | A | A | A | A |
| 1030375 | COG1349KG   | gbs1337 |        | Cellular processes                   |                                               | Transcription                                                | 2.038 |   |   |          |                                                    |       |   |       |          |                                                    |       |       |   |   |   |   |   |   |   |   |   |   |



|         |           |         |       |                                 |                                                                          |                                                                           |        |   |   |   |   |   |   |   |       |       |   |   |   |   |   |   |   |   |
|---------|-----------|---------|-------|---------------------------------|--------------------------------------------------------------------------|---------------------------------------------------------------------------|--------|---|---|---|---|---|---|---|-------|-------|---|---|---|---|---|---|---|---|
| 1030523 | COG1120PH | gbs1462 | fhuA  | Metabolism and transport        | Inorganic ion transport and metabolism                                   | Ferrichrome transport ATP-binding protein fhuC                            | 6.917  | P | A | A | A | P | M | A | A     | 1.275 | P | A | P | A | A | P | A | A |
| 1030524 | COG0614P  | gbs1463 | fhuD  | Metabolism and transport        | Inorganic ion transport and metabolism                                   | Ferrichrome-binding protein                                               | 2.223  | P | P | P | P | P | P | P | P     | 0.828 | P | P | P | P | P | P | P | P |
| 1030528 | COG0609P  | gbs1464 | fhuB  | Metabolism and transport        | Inorganic ion transport and metabolism                                   | Ferrichrome transport system permease protein fhuB                        | 1.562  | P | A | P | M | P | P | A | A     | 0.621 | P | A | P | A | A | P | A | A |
| 1030533 | COG0609P  | gbs1465 | fhuG  | Metabolism and transport        | Inorganic ion transport and metabolism                                   | Ferrichrome transport system permease protein fhuG                        | 10.270 | P | A | A | A | A | A | A | A     | 2.397 | P | A | A | A | A | A | A | A |
| 1030525 | -         | gbs1466 | -     | Hypothetical                    | -                                                                        | Hypothetical cytosolic protein                                            | 2.104  | P | P | P | P | P | P | P | 1.274 | P     | A | A | A | A | P | P | P |   |
| 1030534 | COG1227C  | gbs1467 | ppaC  | Metabolism and transport        | Energy production and conversion                                         | Inorganic pyrophosphatase (EC 3.6.1.1)                                    | 0.883  | P | P | P | P | P | P | P | 0.913 | P     | P | P | P | P | P | P | P |   |
| 1030531 | COG1180O  | gbs1468 | pfIC  | Metabolism and transport        | Energy production and conversion                                         | Pyruvate formate-lyase activating enzyme (EC 1.97.1.4)                    | 0.975  | P | P | P | P | P | P | P | 1.554 | P     | P | P | P | P | P | P | P |   |
| 1030539 | COG1253R  | gbs1469 | hlyX  | General function predicted only | -                                                                        | Magnesium and cobalt efflux protein corC                                  | 2.062  | P | P | P | P | P | P | P | 1.071 | P     | P | P | P | P | P | P | P |   |
| 1030537 | -         | gbs1470 | -     | Metabolism and transport        | Central intermediary metabolism                                          | SAM-dependent methyltransferase (EC 2.1.-.-)                              | 1.680  | P | P | P | P | P | P | P | 1.118 | P     | A | P | A | P | P | P | M |   |
| 1030543 | COG1242R  | gbs1471 | -     | General function predicted only | -                                                                        | Radical SAM superfamily protein                                           | 1.989  | P | A | P | P | P | P | A | 2.066 | P     | A | P | A | A | M | A | A |   |
| 1030536 | COG0671I  | gbs1472 | -     | Metabolism and transport        | Fatty acid and phospholipids                                             | Membrane-associated phospholipid phosphatase                              | 0.665  | P | P | P | P | P | P | P | 1.730 | P     | A | P | P | P | P | P | P |   |
| 1030535 | COG3601S  | gbs1473 | -     | Transport and binding proteins  | Unknown substrate                                                        | Riboflavin transporter                                                    | 0.559  | P | P | P | P | P | P | P | 1.041 | P     | A | P | P | P | P | P | P |   |
| 1030548 | COG4932M  | gbs1474 | piIC  | hypothetical                    | -                                                                        | LPXTG Hypothetical protein                                                | 1.896  | P | A | P | P | P | P | P | 2.547 | P     | A | P | A | P | A | M | A |   |
| 1030545 | COG3764M  | gbs1475 | -     | Cellular processes              | Posttranslational modification, protein turnover, chaperones             | Sortase                                                                   | 3.932  | P | A | P | A | P | P | A | 3.413 | P     | A | P | A | A | A | A | A |   |
| 1030542 | COG3764M  | gbs1476 | -     | Cellular processes              | Posttranslational modification, protein turnover, chaperones             | Sortase                                                                   | 2.719  | P | P | P | P | P | P | P | 1.784 | P     | P | P | A | P | M | P | P |   |
| 1030552 | -         | gbs1477 | piIB  | Hypothetical                    | -                                                                        | IPXTG Cell wall surface anchor family protein                             | 0.639  | P | P | P | P | P | P | P | 4.661 | P     | A | P | A | A | P | P | A |   |
| 1030551 | COG4932M  | gbs1478 | piIA  | Cell Envelope                   | Other                                                                    | IPXTG Collagen adhesion protein                                           | 3.320  | P | A | P | A | A | A | A | 6.161 | P     | A | A | A | A | A | A | A |   |
| 1030555 | -         | gbs1479 | rogB  | Cellular processes              | Transcription                                                            | Transcriptional regulator RogB                                            | 2.564  | P | P | A | P | M | P | P | 2.312 | P     | A | A | A | A | A | A | A |   |
| 1030549 | COG0438M  | gbs1480 | -     | Cell Envelope                   | Biosynthesis and degradation of surface polysaccharides and lipoproteins | N-acetylglucosaminyl-phosphatidylinositol biosynthetic protein            | 2.621  | P | A | P | A | P | A | A | 2.220 | P     | A | A | A | A | P | A | A |   |
| 1030556 | COG1216R  | gbs1481 | -     | General function predicted only | -                                                                        | dTDP-rhamnosyl transferase rfbF (EC 2.-.-.-)                              | 4.220  | P | A | P | M | P | P | A | 2.589 | P     | A | P | A | P | P | P | P |   |
| 1030557 | COG2244R  | gbs1482 | -     | General function predicted only | -                                                                        | Oligosaccharide translocase (flippase)                                    | 3.438  | P | A | A | A | A | A | A | 1.687 | P     | A | A | A | M | A | A | A |   |
| 1030553 | -         | gbs1483 | -     | Hypothetical                    | -                                                                        | Hypothetical protein                                                      | 3.286  | P | P | P | P | P | A | P | 1.281 | P     | P | A | P | P | P | P | P |   |
| 1030563 | COG0463M  | gbs1484 | -     | Metabolism and transport        | Central intermediary metabolism                                          | Glycosyltransferase involved in cell wall biogenesis (EC 2.4.-.-)         | 2.584  | P | P | P | P | P | P | P | 1.566 | P     | P | P | P | P | P | P | P |   |
| 1030560 | COG0463M  | gbs1485 | -     | Metabolism and transport        | Central intermediary metabolism                                          | Glycosyltransferase involved in cell wall biogenesis (EC 2.4.-.-)         | 2.474  | P | P | P | P | P | P | P | 1.187 | P     | P | P | P | P | P | P | P |   |
| 1030566 | COG0451MG | gbs1486 | -     | Hypothetical                    | -                                                                        | UDP-D-glucuronate carboxy-lyase (EC 4.1.1.35)                             | 2.314  | P | P | P | P | P | P | P | 1.313 | P     | P | P | P | P | P | P | P |   |
| 1030559 | COG1211I  | gbs1487 | -     | Metabolism and transport        | Fatty acid and phospholipids                                             | 2-C-methyl-D-erythritol 4-phosphate cytidyltransferase (EC 2.7.7.60)      | 1.656  | P | P | P | A | P | P | P | 1.262 | P     | A | P | A | P | P | A | A |   |
| 1030567 | COG3475M  | gbs1488 | -     | Cell Envelope                   | Biosynthesis and degradation of surface polysaccharides and lipoproteins | Lipo oligosaccharide cholinephosphotransferase (EC 2.7.8.-)               | 1.866  | P | P | P | P | P | P | P | 0.748 | P     | P | P | P | P | P | P | P |   |
| 1030565 | -         | gbs1489 | -     | Hypothetical                    | -                                                                        | Hypothetical protein                                                      | 4.095  | P | A | A | A | A | A | A | 1.862 | P     | A | A | A | A | A | A | A |   |
| 1030564 | COG2456S  | gbs1490 | -     | Hypothetical                    | -                                                                        | Hypothetical membrane spanning protein                                    | 4.094  | P | P | P | P | P | P | P | 1.682 | P     | A | P | P | P | P | P | P |   |
| 1030570 | COG0463M  | gbs1491 | -     | Metabolism and transport        | Central intermediary metabolism                                          | Glycosyltransferase involved in cell wall biogenesis (EC 2.4.-.-)         | 2.703  | P | A | P | A | P | A | A | 0.967 | P     | A | A | A | M | M | A | A |   |
| 1030568 | COG0463M  | gbs1492 | rgpBC | Cell Envelope                   | Biosynthesis and degradation of murein sacculus and peptidoglycan        | alpha-L-Rha alpha-1,3-L-rhamnosyltransferase (EC 2.4.1.-)                 | 2.834  | P | A | A | A | A | A | A | 1.800 | P     | A | A | A | A | A | A | A |   |
| 1030571 | COG0438M  | gbs1493 | rgpAC | Cell Envelope                   | Biosynthesis and degradation of murein sacculus and peptidoglycan        | alpha-D-GlcNAc alpha-1,2-L-rhamnosyltransferase (EC 2.4.1.-)              | 3.018  | P | A | P | A | A | A | A | 1.258 | P     | A | A | A | A | A | A | A |   |
| 1030575 | COG1091M  | gbs1494 | rmdID | Metabolism and transport        | Carbohydrates, organic alcohols, and acids                               | dTDP-4-dehydrohamnose reductase (EC 1.1.1.133)                            | 1.175  | P | P | P | A | P | P | P | 1.085 | P     | A | A | A | A | A | A | A |   |
| 1030577 | -         | gbs1495 | -     | Hypothetical                    | -                                                                        | Hypothetical cytosolic protein                                            | 1.577  | P | P | P | P | P | P | P | 0.943 | P     | A | P | M | M | P | P | A |   |
| 1030574 | COG0568K  | gbs1496 | ropD  | Cellular processes              | Transcription                                                            | RNA polymerase sigma factor ropD                                          | 2.372  | P | P | P | P | P | P | P | 1.227 | P     | A | P | A | P | P | A | A |   |
| 1030576 | COG0358L  | gbs1497 | dnaG  | Cellular processes              | DNA replication, recombination and repair                                | DNA primase (EC 2.7.7.-)                                                  | 3.439  | P | A | A | A | M | A | A | 1.070 | P     | A | P | A | P | P | A | A |   |
| 1030572 | -         | gbs1498 | mscL  | Transport and binding proteins  | Unknown substrate                                                        | Large-conductance mechanosensitive channel                                | 0.439  | P | P | A | P | P | P | P | 0.548 | P     | A | P | P | P | P | P | P |   |
| 1030581 | COG0828J  | gbs1499 | rpsU  | Cellular processes              | Translation, ribosomal structure and biogenesis                          | SSU ribosomal protein S21P                                                | 0.568  | P | P | P | P | P | P | P | 0.608 | P     | P | P | P | P | P | P | P |   |
| 1030579 | COG0727R  | gbs1500 | -     | Hypothetical                    | -                                                                        | Hypothetical protein                                                      | 1.128  | P | A | P | A | P | A | A | 0.690 | A     | A | A | A | A | A | A | A |   |
| 1030580 | COG0834E  | gbs1501 | -     | Metabolism and transport        | Amino acids, peptides, aminosugars and amines                            | Arginine-binding protein                                                  | 0.674  | P | P | P | M | P | M | P | 0.325 | P     | A | P | A | M | P | A | A |   |
| 1030578 | -         | gbs1502 | -     | Metabolism and transport        | Amino acids, peptides, aminosugars and amines                            | Ammonium transporter                                                      | 0.455  | P | P | P | P | P | M | P | 0.191 | P     | A | P | M | A | A | A | P |   |
| 1030584 | COG0492O  | gbs1503 | -     | Cellular processes              | Posttranslational modification, protein turnover, chaperones             | Oxidoreductase (EC 1.1.1.-)                                               | 1.149  | P | A | A | A | A | A | A | 0.400 | A     | A | A | A | A | A | A | A |   |
| 1030583 | COG1054R  | gbs1504 | -     | Metabolism and transport        | Central intermediary metabolism                                          | Rhodanese-related sulfurtransferases                                      | 1.231  | P | P | A | A | P | P | P | 0.815 | P     | A | P | A | M | P | P | A |   |
| 1030582 | -         | gbs1505 | -     | Hypothetical                    | -                                                                        | Hypothetical protein                                                      | 0.771  | P | P | P | P | P | P | P | 0.608 | P     | A | P | A | P | P | P | P |   |
| 1030586 | COG2271G  | gbs1506 | -     | Metabolism and transport        | Carbohydrates, organic alcohols, and acids                               | Transporter                                                               | 0.969  | A | A | A | A | A | A | A | 1.795 | P     | A | A | A | A | A | A | A |   |
| 1030592 | COG0508G  | gbs1507 | glgP  | Metabolism and transport        | Carbohydrates, organic alcohols, and acids                               | Maltodextrin phosphorylase (EC 2.4.1.1)                                   | 0.636  | P | P | P | P | P | P | P | 3.406 | P     | P | P | P | P | P | P | P |   |
| 1030595 | -         | gbs1508 | malM  | Metabolism and transport        | Carbohydrates, organic alcohols, and acids                               | 4-alpha-glucanotransferase (EC 2.4.1.25)                                  | 0.353  | P | P | P | P | P | P | P | 2.730 | P     | A | P | M | A | P | P | P |   |
| 1030593 | COG1609K  | gbs1509 | malR  | Cellular processes              | Transcription                                                            | Transcriptional regulator, LacI family                                    | 2.693  | P | P | P | A | P | P | A | 1.434 | P     | A | A | A | A | A | A | A |   |
| 1030597 | COG2182G  | gbs1510 | malE  | Metabolism and transport        | Carbohydrates, organic alcohols, and acids                               | Maltose maltodextrin-binding protein                                      | 0.242  | P | P | P | P | P | P | P | 0.967 | P     | A | P | P | P | P | P | P |   |
| 1030591 | COG1175G  | gbs1511 | malF  | Metabolism and transport        | Carbohydrates, organic alcohols, and acids                               | Maltodextrin transport system permease protein malC                       | 0.482  | P | M | P | P | P | P | P | 1.757 | P     | P | P | P | P | P | P | P |   |
| 1030599 | COG3833G  | gbs1512 | malG  | Metabolism and transport        | Carbohydrates, organic alcohols, and acids                               | Maltose transport system permease protein malG                            | 0.663  | P | P | P | P | P | P | P | 2.179 | P     | P | P | P | P | P | P | P |   |
| 1030600 | COG3104E  | gbs1513 | -     | Metabolism and transport        | Amino acids, peptides, aminosugars and amines                            | Di- tripeptide transporter                                                | 2.751  | P | M | P | P | M | P | A | 1.047 | P     | A | P | A | P | A | A | A |   |
| 1030598 | COG0494LR | gbs1514 | -     | Cellular processes              | DNA replication, recombination and repair                                | Phosphohydrolase (MutT nudix family protein)                              | 4.039  | P | A | A | A | A | A | A | 2.023 | P     | A | A | A | A | A | A | A |   |
| 1030603 | -         | gbs1515 | -     | Hypothetical                    | -                                                                        | Hypothetical protein                                                      | 4.143  | P | A | A | A | A | A | A | 2.247 | P     | A | A | A | M | A | A | P |   |
| 1030602 | -         | gbs1516 | -     | Hypothetical                    | -                                                                        | surface protein PIs                                                       | 1.840  | P | M | P | P | P | A | P | 1.212 | P     | A | P | A | P | P | A | P |   |
| 1030607 | COG0438M  | gbs1517 | -     | Metabolism and transport        | Central intermediary metabolism                                          | Probable poly(Glycerol-phosphate) alpha-glucosyltransferase (EC 2.4.1.52) | 2.859  | P | A | A | A | A | A | A | 2.594 | P     | A | A | A | A | A | A | A |   |
| 1030610 | COG0653U  | gbs1518 | -     | Cellular processes              | Posttranslational modification, protein turnover, chaperones             | Protein translocase subunit secA                                          | 2.282  | P | A | A | A | A | A | A | 0.944 | P     | A | P | A | M | A | A | A |   |
| 1030609 | -         | gbs1519 | -     | Hypothetical                    | -                                                                        | Hypothetical protein                                                      | 2.148  | P | A | A | A | A | A | A | 1.751 | P     | A | P | A | A | P | A | A |   |
| 1030608 | -         | gbs1520 | -     | Hypothetical                    | -                                                                        | Hypothetical protein                                                      | 3.016  | P | P | A | A | P | M | P | 1.048 | P     | M | P | M | P | P | A | P |   |
| 1030605 | -         | gbs1521 | -     | Hypothetical                    | -                                                                        | Hypothetical protein                                                      | 19.176 | P | A | A | A | A | A | A | 2.181 | P     | A | A | A | A | A | A | A |   |
| 1030604 | COG0201U  | gbs1522 | -     | Cellular processes              | Posttranslational modification, protein turnover, chaperones             | Protein translocase subunit secY                                          | 2.476  | P | M | P | A | M | P | A | 1.676 | P     | A | P | P | P | A | P | P |   |
| 1030612 | -         | gbs1523 | -     | Hypothetical                    | -                                                                        | Hypothetical protein                                                      | 1.952  | P | A | P | M | P | A | A | 1.119 | P     | P | P | P | P | M | P | P |   |
| 1030613 | COG0463M  | gbs1524 | -     | Metabolism and transport        | Central intermediary metabolism                                          | Glycosyltransferase (EC 2.4.1.-)                                          | 2.747  | P | A | A | A | A | A | A | 1.840 | P     | A | P | A | A | A | A | A |   |
| 1030614 | COG1442M  | gbs1525 | -     | Metabolism and transport        | Central intermediary metabolism                                          | Glycosyl transferase, family 8                                            | 5.160  | P | A | A | A | A | A | A | 1.701 | P     | A | A | A | A | A | A | A |   |
| 1030611 | COG1442M  | gbs1526 | -     | Metabolism and transport        | Central intermediary metabolism                                          | Glycosyl transferase, family 8                                            | 6.786  | M | A | A | A | A | A | A | 2.074 | P     | A | A | A | A | A | A | A |   |
| 1030617 | COG1442M  | gbs1527 | -     | Metabolism and transport        | Central intermediary metabolism                                          | Glycosyl transferase, family 8                                            | 1.499  | P | M | P | A | A | A | A | 0.732 | P     | A | M | A | A | A | A | A |   |
| 1030616 | -         | gbs1528 | -     | Metabolism and transport        | Carbohydrates, organic alcohols, and acids                               | Putative galactofuranosyltransferase (EC 2.4.1.-)                         | 1.998  | P | A | A | A | A | A | A | 2.950 | P     | A | A | A | A | A | A | A |   |
| 1030619 | -         | gbs1529 | -     | Cell Envelope                   | Other                                                                    | LPXTG Fibronectin-binding protein                                         | 1.279  | P | A | A | A | P | A | A | 0.341 | P     | A | A | A | M | P | P | A |   |
| 1030615 | -         | gbs1530 | rofA  | Cellular processes              | Transcription                                                            | Transcriptional regulator RogB                                            | 2.722  | P | A | P | A | P | P | A | 1.062 | P     | A | P | A | A | P | A | A |   |
| 1030621 | COG0556L  | gbs1531 | UvrB  | Cellular processes              | DNA replication, recombination and repair                                | Excinuclease ABC subunit B                                                | 1.213  | P | A | P | A | P | P | A | 0.868 | P     | A | A | A | P | A | A | A |   |
| 1030620 | -         | gbs1532 | -     | Cellular processes              | Posttranslational modification, protein turnover, chaperones             | CAAX amino terminal protease family                                       | 2.636  | P | P | P | P | P | P | P | 1.049 | P     | A | P | A | M | P | P | M |   |







|         |           |         |          |                                 |                                                                                 |                                                                                 |        |   |   |   |   |   |   |   |       |       |   |   |   |   |   |   |   |   |   |
|---------|-----------|---------|----------|---------------------------------|---------------------------------------------------------------------------------|---------------------------------------------------------------------------------|--------|---|---|---|---|---|---|---|-------|-------|---|---|---|---|---|---|---|---|---|
| 1030683 | COG1321K  | gbs1749 |          | Cellular processes              | Transcription                                                                   | Iron-dependent repressor                                                        | 3.031  | P | A | P | A | A | P | A | P     | 3.089 | P | A | A | A | A | A | A | A | A |
| 1030685 | COG2131F  | gbs1750 | comEB    | Metabolism and transport        | Purines, pyrimidines, nucleosides, and nucleotides                              | ComE operon protein 2                                                           | 1.911  | P | M | P | A | P | P | P | A     | 3.418 | P | A | A | A | A | A | A | A | A |
| 1030715 | COG0006E  | gbs1751 |          | Metabolism and transport        | Amino acids, peptides, aminosugars and amines                                   | Xaa-Pro dipeptidase (EC 3.4.13.9)                                               | 1.331  | P | P | P | P | P | P | P | P     | 1.992 | P | A | A | A | A | M | A | A | A |
| 1030708 | -         | gbs1752 |          | Hypothetical                    |                                                                                 | Hypothetical protein                                                            | 1.603  | P | A | A | A | A | A | A | A     | 1.044 | P | A | A | A | A | A | A | A | A |
| 1030687 | -         | gbs1753 |          | Cellular processes              | Toxin production and resistance                                                 | Multidrug resistance protein B                                                  | 1.505  | P | A | A | A | A | A | A | A     | 0.583 | P | A | A | A | A | A | A | A | A |
| 1030705 | COG0178L  | gbs1754 | uvrA     | Cellular processes              | DNA replication, recombination and repair                                       | Excinuclease ABC subunit A                                                      | 1.540  | P | A | A | A | A | A | A | A     | 1.045 | P | A | A | A | A | A | A | A | A |
| 1030719 | -         | gbs1755 |          | Hypothetical                    |                                                                                 | Hypothetical membrane spanning protein                                          | 1.712  | P | P | P | A | M | P | A | A     | 0.568 | M | A | P | A | A | P | A | A | A |
| 1030723 | COG0598P  | gbs1756 | corA     | Metabolism and transport        | Inorganic ion transport and metabolism                                          | Magnesium and cobalt transport protein corA                                     | 2.008  | P | P | P | M | P | P | P | P     | 0.568 | P | A | P | A | A | P | A | A | A |
| 1030704 | -         | gbs1757 | rpsR     | Cellular processes              | Translation, ribosomal structure and biogenesis                                 | SSU ribosomal protein S18P                                                      | 0.715  | P | P | P | P | P | P | P | P     | 0.378 | P | P | P | P | P | P | P | P | P |
| 1030713 | COG0629L  | gbs1758 | ssb3     | Cellular processes              | DNA replication, recombination and repair                                       | Single strand binding protein                                                   | 1.012  | P | P | P | P | P | P | P | P     | 0.424 | P | P | P | P | P | P | P | P | P |
| 1030730 | COG0360J  | gbs1759 | rpsF     | Cellular processes              | Translation, ribosomal structure and biogenesis                                 | SSU ribosomal protein S6P                                                       | 0.797  | P | P | P | P | P | P | P | P     | 0.396 | P | P | P | P | P | P | P | P | P |
| 1030720 | COG1194L  | gbs1760 | mutY     | Cellular processes              | DNA replication, recombination and repair                                       | A.G-specific adenine DNA glycosylase (EC 3.2.2.-)                               | 1.505  | P | P | P | A | P | P | P | P     | 0.922 | P | A | P | A | A | P | M | A | A |
| 1030726 | COG1396K  | gbs1761 |          | Cellular processes              | Transcription                                                                   | Transcriptional regulator                                                       | 0.795  | P | M | P | P | P | P | P | P     | 0.841 | P | A | A | A | A | A | A | A | A |
| 1030744 | COG0526OC | gbs1762 | trx      | Metabolism and transport        | Energy production and conversion                                                | Thioredoxin                                                                     | 1.273  | P | P | P | P | P | P | P | P     | 1.033 | P | P | P | P | P | P | P | P | P |
| 1031017 | -         | gbs1763 |          | Metabolism and transport        | Fatty acid and phospholipids                                                    | Phosphatidylglycerophosphatase B (EC 3.1.3.27)                                  | 2.334  | P | P | P | P | P | P | P | P     | 1.332 | P | P | P | P | P | P | P | P | P |
| 1030736 | COG1193L  | gbs1764 | mutS2    | Cellular processes              | DNA replication, recombination and repair                                       | DNA mismatch repair protein mutS                                                | 2.578  | P | A | A | A | A | A | A | A     | 1.849 | P | A | A | A | A | A | A | A | A |
| 1031828 | -         | gbs1765 |          | General function predicted only |                                                                                 | CvpA family membrane protein                                                    | 1.542  | P | P | P | P | P | P | P | P     | 1.035 | P | A | P | P | P | P | P | A | A |
| 1030758 | -         | gbs1766 |          | Hypothetical                    |                                                                                 | Hypothetical cytosolic protein                                                  | 2.718  | P | P | P | P | P | P | P | P     | 2.041 | P | A | P | P | P | P | P | P | P |
| 1031367 | COG1039L  | gbs1767 |          | Cellular processes              | Transcription                                                                   | Ribonuclease HIII (EC 3.1.26.4)                                                 | 5.060  | P | A | P | A | P | P | P | P     | 1.381 | P | A | P | A | P | P | P | P | A |
| 1030794 | COG0681U  | gbs1768 | spi      | Cellular processes              | Posttranslational modification, protein turnover, chaperones                    | Signal peptidase I (EC 3.4.21.89)                                               | 1.330  | P | P | P | P | P | P | P | P     | 0.712 | P | A | P | A | P | P | P | P | P |
| 1030802 | COG0507L  | gbs1769 | recD     | Cellular processes              | DNA replication, recombination and repair                                       | Exodeoxyribonuclease V alpha chain (EC 3.1.11.5)                                | 0.910  | P | A | A | A | A | A | A | A     | 0.622 | A | A | A | A | A | A | A | A | A |
| 1030764 | -         | gbs1770 |          | Hypothetical                    |                                                                                 | Hypothetical protein                                                            | 0.505  | P | P | P | P | P | P | P | P     | 1.297 | P | P | P | P | P | P | P | P | P |
| 1031309 | COG0389L  | gbs1771 | dinP     | Cellular processes              | DNA replication, recombination and repair                                       | DNA polymerase IV (EC 2.7.7.7)                                                  | 1.125  | P | P | P | P | P | P | P | P     | 0.760 | P | A | P | P | P | M | P | P | P |
| 1030768 | COG1882C  | gbs1772 | pfl      | Metabolism and transport        | Energy production and conversion                                                | Formate acetyltransferase (EC 2.3.1.54)                                         | 0.368  | P | P | P | P | P | P | P | P     | 0.533 | P | P | P | P | P | P | P | P | P |
| 1030831 | -         | gbs1773 |          | General function predicted only |                                                                                 | FMN-binding protein                                                             | 0.590  | P | P | P | P | P | P | P | P     | 0.871 | P | P | P | P | P | P | P | P | P |
| 1030769 | COG1680V  | gbs1774 |          | Cellular processes              | Toxin production and resistance                                                 | Beta-lactamase family protein                                                   | 2.309  | P | P | P | A | P | P | A | P     | 0.631 | P | A | A | A | M | A | A | A | A |
| 1030770 | -         | gbs1775 |          | Hypothetical                    |                                                                                 | Hypothetical cytosolic protein                                                  | 1.464  | P | P | P | M | P | P | A | P     | 0.525 | P | A | P | A | P | P | A | A | A |
| 1030773 | -         | gbs1776 |          | Hypothetical                    |                                                                                 | Hypothetical membrane spanning protein                                          | 2.502  | P | P | P | A | P | P | P | P     | 0.523 | P | A | P | A | P | P | A | A | A |
| 1030776 | -         | gbs1777 | glpF.2   | Metabolism and transport        | Carbohydrates, organic alcohols, and acids                                      | Aquaporin Glycerol uptake facilitator protein                                   | 1.812  | P | P | P | P | P | P | P | P     | 0.884 | P | A | P | P | P | P | P | A | A |
| 1030777 | COG0589T  | gbs1778 |          | Cellular processes              | Posttranslational modification, protein turnover, chaperones                    | Universal stress protein family                                                 | 2.426  | A | A | A | A | A | A | A | A     | 0.512 | A | A | A | A | A | A | A | A | A |
| 1031468 | -         | gbs1779 | norA     | Transport and binding proteins  | Unknown substrate                                                               | Transporter, MFS superfamily                                                    | 0.907  | P | A | A | A | A | M | A | A     | 0.734 | A | A | A | A | A | A | A | A | A |
| 1030778 | COG0664T  | gbs1780 | srv      | Cellular processes              | Transcription                                                                   | Transcription regulator, crp family                                             | 1.266  | P | P | P | P | P | P | P | P     | 1.716 | P | A | P | A | M | P | A | P | A |
| 1030789 | COG2936R  | gbs1781 | pepXP    | Metabolism and transport        | Amino acids, peptides, aminosugars and amines                                   | Xaa-Pro dipeptidyl-peptidase (EC 3.4.14.11)                                     | 1.434  | P | P | P | P | P | P | P | P     | 1.015 | P | A | P | P | P | P | P | P | P |
| 1031410 | -         | gbs1782 |          | Hypothetical                    |                                                                                 | Hypothetical protein                                                            | 3.450  | P | P | P | A | P | P | P | P     | 2.986 | P | A | P | A | P | P | A | P | A |
| 1030790 | COG0142H  | gbs1783 |          | Metabolism and transport        | Cofactors, prosthetic groups, and carriers                                      | Farnesyl pyrophosphate synthetase (EC 2.5.1.1) Geranyltransferase (EC 2.5.1.10) | 2.004  | P | P | P | P | P | P | P | P     | 1.154 | P | A | P | A | M | P | P | M | P |
| 1030803 | COG4987CO | gbs1784 |          | Metabolism and transport        | Energy production and conversion                                                | Transport ATP-binding protein cydC                                              | 13.095 | A | A | A | A | A | A | A | A     | 2.010 | A | A | A | A | A | A | A | A | A |
| 1030795 | COG4988CO | gbs1785 |          | Metabolism and transport        | Energy production and conversion                                                | Transport ATP-binding protein cydD                                              | 2.182  | P | A | A | A | A | A | A | A     | 1.770 | P | A | A | A | A | A | A | A | A |
| 1030801 | COG1294C  | gbs1786 |          | Metabolism and transport        | Energy production and conversion                                                | Cytochrome d ubiquinol oxidase subunit II (EC 1.10.3.-)                         | 1.912  | P | P | P | P | P | P | P | P     | 1.220 | P | P | P | P | P | P | P | P | P |
| 1030701 | COG1271C  | gbs1787 |          | Metabolism and transport        | Energy production and conversion                                                | Cytochrome d ubiquinol oxidase subunit I (EC 1.10.3.-)                          | 1.837  | P | P | P | P | P | P | P | P     | 1.011 | P | P | P | P | P | P | P | P | P |
| 1030807 | COG1523C  | gbs1788 |          | Metabolism and transport        | Energy production and conversion                                                | NADH dehydrogenase family                                                       | 1.446  | P | A | P | A | P | A | P | A     | 0.838 | P | A | P | A | A | P | P | A | A |
| 1030761 | COG1575H  | gbs1789 |          | Metabolism and transport        | Cofactors, prosthetic groups, and carriers                                      | 1,4-dihydroxy-2-naphthoate polypropenyltransferase (EC 2.5.1.-)                 | 1.823  | P | A | A | A | A | A | A | A     | 0.972 | P | A | M | A | A | A | P | P | A |
| 1030847 | -         | gbs1790 |          | Hypothetical                    |                                                                                 | Hypothetical protein                                                            | 0.637  | P | P | P | P | P | P | P | P     | 0.782 | P | P | P | P | P | P | P | P | P |
| 1030848 | COG0718S  | gbs1791 |          | Hypothetical                    |                                                                                 | Hypothetical cytosolic protein                                                  | 1.815  | P | P | P | P | P | P | P | P     | 0.865 | P | A | P | P | P | P | P | P | P |
| 1030850 | COG2230M  | gbs1792 |          | Cell Envelope                   | Biosynthesis and degradation of surface polysaccharides and lipopolysaccharides | Cyclopropane-fatty-acyl-phospholipid synthase (EC 2.1.1.79)                     | 1.467  | P | P | P | P | P | P | P | P     | 0.448 | P | A | A | A | A | A | A | A | A |
| 1030851 | COG0789K  | gbs1793 |          | Cellular processes              | Transcription                                                                   | Transcriptional regulator, MerR family                                          | 0.681  | P | P | P | P | P | P | P | P     | 0.929 | P | A | P | A | P | P | P | P | P |
| 1030859 | COG0847L  | gbs1794 | dnaQ     | Cellular processes              | DNA replication, recombination and repair                                       | DNA polymerase III, epsilon chain (EC 2.7.7.7)                                  | 1.583  | P | P | P | P | P | P | P | P     | 1.451 | P | A | A | A | A | P | A | P | A |
| 1030852 | -         | gbs1795 |          | Hypothetical                    |                                                                                 | Hypothetical cytosolic protein                                                  | 2.967  | P | P | P | P | P | P | P | P     | 1.207 | P | P | P | P | P | P | P | P | P |
| 1030856 | COG2081R  | gbs1796 |          | General function predicted only |                                                                                 | NAD(FAD)-utilizing dehydrogenases                                               | 1.132  | P | A | P | A | P | A | A | A     | 0.710 | M | A | A | A | A | A | A | A | A |
| 1030860 | COG1085C  | gbs1797 |          | Metabolism and transport        | Energy production and conversion                                                | Galactose-1-phosphate uridylyltransferase (EC 2.7.7.10)                         | 1.121  | P | P | P | P | P | P | M | 0.677 | P     | A | P | A | P | P | A | A | A | A |
| 1030855 | COG0199J  | gbs1798 | rpsN2    | Cellular processes              | Translation, ribosomal structure and biogenesis                                 | SSU ribosomal protein S14P                                                      | 0.444  | P | P | P | P | P | P | P | P     | 1.668 | P | P | P | P | P | P | P | P | P |
| 1030854 | COG2008E  | gbs1799 |          | Metabolism and transport        | Amino acids, peptides, aminosugars and amines                                   | Low-specificity L-threonine aldolase (EC 4.1.2.5)                               | 1.301  | P | P | P | P | P | P | P | P     | 0.982 | P | A | P | A | P | M | A | P | A |
| 1030853 | COG0533O  | gbs1800 |          | Cellular processes              | Posttranslational modification, protein turnover, chaperones                    | O-sialoglycoprotein endopeptidase (EC 3.4.24.57)                                | 1.999  | P | A | M | A | A | A | A | A     | 1.027 | P | A | A | A | A | P | A | A | A |
| 1030862 | COG0456R  | gbs1801 |          | Cellular processes              | Translation, ribosomal structure and biogenesis                                 | Ribosomal protein-S18-alanine acetyltransferase (EC 2.3.1.128)                  | 2.932  | P | P | P | P | P | P | P | P     | 0.939 | P | A | P | A | M | P | A | P | A |
| 1030865 | COG1214O  | gbs1802 |          | Cellular processes              | Posttranslational modification, protein turnover, chaperones                    | Non-proteolytic protein, peptidase family M22                                   | 2.595  | P | A | M | A | A | A | A | A     | 1.250 | P | A | A | A | A | P | A | P | A |
| 1030868 | -         | gbs1803 |          | General function predicted only |                                                                                 | Putative transcriptional regulator                                              | 2.689  | P | P | P | P | P | P | P | P     | 1.539 | P | P | P | P | P | P | P | P | P |
| 1030867 | COG0595R  | gbs1804 |          | General function predicted only |                                                                                 | Zn-dependent hydrolase (EC 3.-.-.-)                                             | 2.285  | P | P | P | P | P | P | P | P     | 1.702 | P | A | P | A | P | P | P | P | A |
| 1030861 | COG3942R  | gbs1805 |          | General function predicted only |                                                                                 | Secreted protein                                                                | 2.208  | P | A | A | A | A | P | A | A     | 0.828 | A | A | A | A | A | A | A | A | A |
| 1030872 | -         | gbs1806 | glnA     | Metabolism and transport        | Amino acids, peptides, aminosugars and amines                                   | Glutamine synthetase (EC 6.3.1.2)                                               | 6.862  | P | M | P | P | P | P | P | P     | 2.133 | P | A | A | A | P | P | A | P | A |
| 1030864 | COG0789K  | gbs1807 |          | Cellular processes              | Transcription                                                                   | Transcriptional regulator, MerR family                                          | 2.655  | P | P | P | P | P | P | P | P     | 0.972 | P | A | P | P | P | P | P | P | P |
| 1030866 | COG4129S  | gbs1808 |          | Hypothetical                    |                                                                                 | Hypothetical protein                                                            | 1.258  | P | M | P | P | P | P | P | P     | 0.790 | P | A | P | A | P | P | A | P | A |
| 1030870 | -         | gbs1809 | pgk      | Metabolism and transport        | Carbohydrates, organic alcohols, and acids                                      | Phosphoglycerate kinase (EC 2.7.2.3)                                            | 0.522  | P | P | P | P | P | P | P | P     | 0.644 | P | A | P | P | P | P | P | P | P |
| 1030873 | COG2503R  | gbs1810 | lppC     | Metabolism and transport        | Cofactors, prosthetic groups, and carriers                                      | Acid phosphatase (EC 3.1.3.2)                                                   | 0.476  | P | P | P | P | P | P | P | P     | 0.748 | P | P | P | P | P | P | P | P | P |
| 1030869 | COG0057G  | gbs1811 | gapC/plr | Metabolism and transport        | Carbohydrates, organic alcohols, and acids                                      | Glyceroldehyde 3-phosphate dehydrogenase (EC 1.2.1.12) GAPDH                    | 0.371  | P | P | P | P | P | P | P | P     | 0.418 | P | P | P | P | P | P | P | P | P |
| 1030871 | COG0480J  | gbs1812 | fus      | Cellular processes              | Translation, ribosomal structure and biogenesis                                 | Protein Translation Elongation Factor G (EF-G)                                  | 0.951  | P | P | P | P | P | P | P | P     | 0.896 | P | P | P | P | P | P | P | P | P |
| 1030883 | COG0049J  | gbs1813 | rpsG     | Cellular processes              | Translation, ribosomal structure and biogenesis                                 | SSU ribosomal protein S7P                                                       | 1.715  | P | P | P | P | P | P | P | P     | 0.723 | P | P | P | P | P | P | P | P | P |
| 1030884 | -         | gbs1814 | rpsL     | Cellular processes              | Translation, ribosomal structure and biogenesis                                 | SSU ribosomal protein S12P                                                      | 1.545  | P | P | P | P | P | P | P | P     | 0.665 | P | P | P | P | P | P | P | P | P |
| 1030890 | COG0503F  | gbs1815 | purR     | Metabolism and transport        | Purines, pyrimidines, nucleosides, and nucleotides                              | SRU operon repressor                                                            | 0.592  | P | P | P | P | P | P | P | P     | 1.059 | P | P | P | M | P | P | P | P | P |
| 1030876 | COG34     |         |          |                                 |                                                                                 |                                                                                 |        |   |   |   |   |   |   |   |       |       |   |   |   |   |   |   |   |   |   |





|         |             |         |       |                                      |                                                              |                                                                                   |       |   |   |   |   |   |   |   |       |       |       |   |   |   |   |   |   |   |   |
|---------|-------------|---------|-------|--------------------------------------|--------------------------------------------------------------|-----------------------------------------------------------------------------------|-------|---|---|---|---|---|---|---|-------|-------|-------|---|---|---|---|---|---|---|---|
| 1031452 | COG3022S    | gbs2036 | yaaA  | Hypothetical                         |                                                              | Hypothetical cytosolic protein                                                    | 1.600 | P | A | P | P | A | P | A | A     | A     | 1.046 | P | A | A | A | A | M | A | A |
| 1031438 | COG0602O    | gbs2037 | nrpG  | Cellular processes                   | Posttranslational modification, protein turnover, chaperones | Anaerobic ribonucleoside-triphosphate reductase activating protein                | 2.601 | P | A | P | P | P | M | A | A     | A     | 1.398 | P | A | P | A | A | M | A | A |
| 1031463 | COG3981R    | gbs2038 |       | Metabolism and transport             | Central intermediary metabolism                              | Acetyltransferase (EC 2.3.1.-)                                                    | 3.991 | P | A | M | A | P | P | A | A     | A     | 3.601 | P | A | A | A | A | A | A | A |
| 1031457 | COG0673R    | gbs2039 |       | Metabolism and transport             | Central intermediary metabolism                              | NAD-dependent oxidoreductase                                                      | 2.480 | P | A | P | A | P | M | A | M     | A     | 2.195 | P | A | A | A | A | A | A | A |
| 1031458 | -           | gbs2040 |       | Hypothetical                         |                                                              | Hypothetical protein                                                              | 1.747 | P | P | P | P | P | P | P | P     | P     | 1.903 | P | P | P | P | P | P | P | P |
| 1031480 | COG1328F    | gbs2041 | nrpD  | Metabolism and transport             | Purines, pyrimidines, nucleosides, and nucleotides           | Anaerobic ribonucleoside-triphosphate reductase (EC 1.17.4.2)                     | 2.046 | P | P | P | P | P | P | P | P     | P     | 0.703 | P | P | P | P | P | P | P | P |
| 1031460 | -           | gbs2042 |       | Hypothetical                         |                                                              | Hypothetical membrane spanning protein                                            | 3.976 | P | A | P | P | P | P | P | P     | P     | 2.491 | P | A | P | A | P | A | P | A |
| 1031467 | COG3906S    | gbs2043 |       | Hypothetical                         |                                                              | Hypothetical cytosolic protein                                                    | 0.625 | P | P | P | P | P | P | P | P     | P     | 1.474 | P | P | P | P | P | P | P | P |
| 1031487 | -           | gbs2044 |       | Cellular processes                   | DNA replication, recombination and repair                    | Endonuclease involved in recombination                                            | 0.528 | P | P | P | P | P | P | P | P     | P     | 1.330 | P | P | P | P | P | P | P | P |
| 1031478 | -           | gbs2045 |       | Hypothetical                         |                                                              | Hypothetical cytosolic protein                                                    | 0.434 | P | P | P | P | P | P | P | P     | P     | 1.002 | P | P | P | P | P | P | P | P |
| 1031465 | COG1393P    | gbs2046 | spxA  | Metabolism and transport             | Inorganic ion transport and metabolism                       | Arsenate reductase family protein                                                 | 0.734 | P | P | P | P | P | P | P | P     | P     | 0.679 | P | P | P | P | P | P | P | P |
| 1031471 | COG0468L    | gbs2047 | recA  | Cellular processes                   | DNA replication, recombination and repair                    | RecA protein                                                                      | 1.456 | P | A | P | A | M | M | A | P     | 1.251 | P     | A | P | A | A | A | M | A | A |
| 1031601 | 1058R, COG1 | gbs2048 | cinA  | General function predicted only      |                                                              | Colligrin                                                                         | 1.380 | P | A | A | M | M | M | A | P     | 0.476 | P     | A | P | A | A | A | M | A | A |
| 1031543 | -           | gbs2049 | tag   | Cellular processes                   | DNA replication, recombination and repair                    | DNA-3-methyladenine glycosylase (EC 3.2.2.20)                                     | 2.487 | P | M | P | A | P | P | A | P     | 1.557 | P     | A | P | A | P | P | A | A | A |
| 1031545 | COG0632L    | gbs2050 | ruvA  | Cellular processes                   | DNA replication, recombination and repair                    | Holliday junction DNA helicase ruvA                                               | 5.742 | P | A | A | A | A | P | A | A     | 3.162 | P     | A | A | A | A | A | A | A | A |
| 1031501 | -           | gbs2051 | ImrP  | Cellular processes                   | Toxin production and resistance                              | Multidrug resistance protein ImrP                                                 | 5.579 | P | A | P | A | A | P | A | A     | 3.410 | P     | A | P | A | A | P | A | A | A |
| 1031648 | COG0323L    | gbs2052 | mutL  | Cellular processes                   | DNA replication, recombination and repair                    | DNA mismatch repair protein mutL                                                  | 2.239 | P | A | P | A | A | A | M | A     | 1.548 | P     | A | A | A | A | A | A | A | A |
| 1031494 | -           | gbs2053 | csp   | Cellular processes                   | Posttranslational modification, protein turnover, chaperones | Cold shock protein                                                                | 1.290 | P | P | P | P | P | P | P | P     | 0.751 | P     | P | P | P | P | P | P | P | P |
| 1031681 | COG0249L    | gbs2054 | mutS  | Cellular processes                   | DNA replication, recombination and repair                    | DNA mismatch repair protein mutS                                                  | 0.816 | P | A | A | A | A | A | A | A     | 0.710 | P     | A | A | A | A | A | A | A | A |
| 1031544 | COG1438K    | gbs2055 | argR2 | Cellular processes                   | Transcription                                                | Arginine repressor, argR                                                          | 1.336 | P | P | P | P | P | P | P | P     | 1.281 | P     | A | P | A | A | P | A | A | A |
| 1031682 | COG0018J    | gbs2056 | argS  | Cellular processes                   | Translation, ribosomal structure and biogenesis              | Arginyl-tRNA synthetase (EC 6.1.1.19)                                             | 1.159 | P | P | P | P | P | P | P | P     | 1.125 | P     | A | P | P | P | P | P | P | P |
| 1031685 | -           | gbs2057 | uvrB  | Hypothetical                         |                                                              | Bacteriocin uvrB                                                                  | 1.674 | P | P | P | P | P | P | P | P     | 2.530 | P     | A | P | A | A | P | A | A | A |
| 1031680 | COG1284S    | gbs2058 |       | Hypothetical                         |                                                              | Hypothetical membrane spanning protein                                            | 1.496 | P | P | P | P | P | A | P | 0.569 | P     | M     | P | M | P | P | A | P | A | P |
| 1030780 | COG1284S    | gbs2059 |       | Hypothetical                         |                                                              | Hypothetical membrane spanning protein                                            | 2.959 | P | P | P | P | P | P | P | 0.967 | P     | P     | P | A | P | P | P | P | P | P |
| 1031827 | COG0173J    | gbs2060 | aspS  | Cellular processes                   | Translation, ribosomal structure and biogenesis              | Aspartyl-tRNA synthetase (EC 6.1.1.12)                                            | 2.238 | P | P | P | M | P | P | P | P     | 0.928 | P     | M | A | P | M | P | M | P | M |
| 1031683 | COG0124J    | gbs2061 | hisS  | Cellular processes                   | Translation, ribosomal structure and biogenesis              | Histidyl-tRNA synthetase (EC 6.1.1.21)                                            | 2.134 | P | M | P | A | P | P | P | A     | 1.301 | P     | A | A | A | A | A | A | A | A |
| 1031684 | COG0333J    | gbs2062 | rpmF  | Cellular processes                   | Translation, ribosomal structure and biogenesis              | LSU ribosomal protein L32P                                                        | 0.853 | P | P | P | P | P | P | P | P     | 0.683 | P     | P | P | P | P | P | P | P | P |
| 1030811 | COG0267J    | gbs2063 | rpmG  | Cellular processes                   | Translation, ribosomal structure and biogenesis              | LSU ribosomal protein L33P                                                        | 0.590 | P | P | P | P | P | P | P | P     | 0.638 | P     | P | P | P | P | P | P | P | P |
| 1030716 | -           | gbs2064 | cadD  | Cellular processes                   | Toxin production and resistance                              | Cadmium resistance protein                                                        | 1.456 | P | A | A | A | A | M | A | A     | 1.357 | P     | A | A | A | A | A | A | A | A |
| 1030808 | COG0640K    | gbs2065 | cadC  | Cellular processes                   | Toxin production and resistance                              | Cadmium efflux system accessory protein                                           | 1.158 | P | A | M | A | P | P | A | A     | 1.398 | P     | A | A | A | A | A | A | A | A |
| 1030814 | -           | gbs2066 |       | Hypothetical                         |                                                              | Hypothetical protein                                                              | 1.156 | P | M | P | P | P | P | P | 2.120 | P     | A     | A | M | A | A | A | A | A | A |
| 1030813 | -           | gbs2067 |       | Hypothetical                         |                                                              | Hypothetical protein                                                              | 0.567 | P | A | M | A | A | A | A | A     | 0.364 | A     | A | A | A | A | A | A | A | A |
| 1030815 | -           | gbs2068 |       | Hypothetical                         |                                                              | Hypothetical protein                                                              | 0.665 | P | P | A | A | P | A | P | 0.596 | P     | A     | M | P | M | P | P | A | A | A |
| 1030830 | COG1674D    | gbs2069 |       | Cellular processes                   | Cell division                                                | FtsK SpoIIIE family                                                               | 1.037 | P | A | A | A | A | A | A | A     | 0.840 | P     | A | A | A | A | A | A | A | A |
| 1031433 | -           | gbs2070 |       | Hypothetical                         |                                                              | Hypothetical protein                                                              | 1.152 | P | A | A | A | A | A | A | A     | 3.029 | P     | A | A | A | A | A | A | A | A |
| 1030817 | -           | gbs2071 |       | Mobile and extrachromosomal elements |                                                              | Replication protein                                                               | 1.141 | A | A | A | A | A | A | A | A     | 0.326 | A     | A | A | A | A | A | A | A | A |
| 1030783 | -           | gbs2072 |       | Mobile and extrachromosomal elements |                                                              | Phage protein                                                                     | 3.419 | P | A | A | A | A | A | A | A     | 1.351 | A     | A | A | A | A | A | A | A | A |
| 1030747 | COG0582L    | gbs2073 |       | Mobile and extrachromosomal elements |                                                              | DNA integration recombination inversion protein                                   | 2.301 | P | P | P | P | P | P | P | 1.311 | P     | P     | P | P | P | P | P | P | P | P |
| 1030842 | -           | gbs2074 |       | Hypothetical                         |                                                              | Hypothetical cytosolic protein                                                    | 5.410 | P | A | P | A | P | P | A | P     | 2.221 | P     | A | P | M | P | A | P | A | P |
| 1030781 | -           | gbs2076 |       | Hypothetical                         |                                                              | Hypothetical protein                                                              | 1.525 | P | M | P | P | P | P | P | 1.307 | P     | A     | P | A | M | A | A | A | A | A |
| 1030820 | -           | gbs2077 |       | Hypothetical                         |                                                              | Hypothetical protein                                                              | 3.107 | P | A | A | P | P | P | P | A     | 0.785 | P     | A | A | P | A | A | A | A | A |
| 1031055 | COG3212S    | gbs2080 |       | Hypothetical                         |                                                              | Hypothetical protein                                                              | 1.059 | P | A | A | A | A | A | A | A     | 0.126 | A     | A | A | A | A | A | A | A | A |
| 1030819 | COG0745TK   | gbs2081 |       | Cellular processes                   | Transcription                                                | Transcriptional regulatory protein                                                | 1.012 | P | P | P | P | P | P | P | 1.162 | P     | A     | P | M | M | P | P | A | P | A |
| 1030759 | COG0642T    | gbs2082 |       | Cellular processes                   | Signal transduction                                          | Two-component sensor kinase czcS (EC 2.7.3.-)                                     | 1.329 | P | P | P | P | P | M | P | 2.094 | P     | A     | A | A | P | A | A | A | A | A |
| 1030703 | COG1288S    | gbs2083 |       | Metabolism and transport             | Amino acids, peptides, aminosugars and amines                | Arginine ornithine antiporter                                                     | 0.308 | A | A | A | A | A | A | A | A     | 6.813 | P     | A | A | A | A | A | A | A | A |
| 1030750 | COG0549E    | gbs2084 |       | Metabolism and transport             | Amino acids, peptides, aminosugars and amines                | Carbamate kinase (EC 2.7.2.2)                                                     | 1.249 | P | A | A | A | A | P | A | A     | 3.280 | P     | A | P | P | A | A | A | A | A |
| 1031013 | COG0078E    | gbs2085 |       | Metabolism and transport             | Amino acids, peptides, aminosugars and amines                | Ornithine carbamoyltransferase (EC 2.1.3.3)                                       | 0.753 | P | A | P | A | P | P | P | P     | 1.972 | P     | A | P | A | P | M | P | A | A |
| 1031066 | COG0642T    | gbs2086 |       | Cellular processes                   | Signal transduction                                          | Sporulation kinase A (EC 2.7.3.-)                                                 | 1.675 | P | A | A | A | A | A | A | A     | 1.760 | A     | A | A | A | A | A | A | A | A |
| 1030729 | COG4753T    | gbs2087 |       | Cellular processes                   | Signal transduction                                          | Two-component response regulator                                                  | 1.391 | P | A | A | A | A | A | A | A     | 1.617 | P     | A | A | A | A | M | A | A | A |
| 1031098 | COG1125E    | gbs2088 | proV  | Metabolism and transport             | Amino acids, peptides, aminosugars and amines                | Glycine betaine transport-ATP-binding protein                                     | 1.815 | P | P | P | P | P | P | P | 1.524 | P     | A     | P | P | P | P | P | P | P | P |
| 1030749 | 1174E, COG1 | gbs2089 |       | Metabolism and transport             | Amino acids, peptides, aminosugars and amines                | Glycine betaine transport system permease protein Glycine betaine-binding prote   | 1.474 | P | P | P | P | P | P | P | 1.048 | P     | P     | P | P | P | P | P | P | P | P |
| 1031102 | 0392S, COG2 | gbs2090 |       | General function predicted only      |                                                              | Lysylcardiolipin synthase (EC 2.3.2.-) Lysyltransferase (EC 2.3.2.3)              | 1.595 | P | P | P | P | P | P | P | 1.521 | P     | A     | P | P | P | P | P | P | P | P |
| 1031088 | COG0596R    | gbs2091 |       | General function predicted only      |                                                              | Non-heme chloroperoxidase (EC 1.11.1.10)                                          | 2.405 | P | P | P | P | P | M | P | 1.566 | P     | A     | P | P | A | M | A | A | A | A |
| 1030688 | COG3759S    | gbs2092 |       | Hypothetical                         |                                                              | Hypothetical membrane spanning protein                                            | 1.475 | A | A | A | A | A | A | A | A     | 0.162 | A     | A | A | A | A | A | A | A | A |
| 1030562 | COG1511S    | gbs2093 |       | Mobile and extrachromosomal elements |                                                              | Phage infection protein                                                           | 3.144 | A | A | A | A | A | A | A | A     | 0.130 | A     | A | A | A | A | A | A | A | A |
| 1030957 | COG1309K    | gbs2094 |       | Cellular processes                   | Transcription                                                | Transcriptional regulator, TetR family                                            | 1.436 | P | A | A | A | A | A | A | A     | 1.060 | P     | A | A | A | A | A | A | A | A |
| 1030235 | -           | gbs2095 |       | Hypothetical                         |                                                              | Hypothetical protein                                                              | 3.872 | P | A | A | A | A | A | A | A     | 0.565 | A     | A | A | A | A | A | A | A | A |
| 1029947 | COG0522J    | gbs2096 | rpsD  | Cellular processes                   | Translation, ribosomal structure and biogenesis              | SSU ribosomal protein S4P                                                         | 1.888 | P | P | P | P | P | P | P | 0.477 | P     | P     | P | P | P | P | P | P | P | P |
| 1031112 | -           | gbs2097 |       | Hypothetical                         |                                                              | Hypothetical protein                                                              | 1.943 | P | P | P | P | P | P | P | 1.504 | P     | P     | P | P | P | P | P | P | P | P |
| 1031046 | COG0305L    | gbs2098 | holB  | Cellular processes                   | DNA replication, recombination and repair                    | Replicative DNA helicase (EC 3.6.1.-)                                             | 2.110 | P | P | P | P | P | P | P | 1.304 | P     | A     | P | A | P | P | P | P | P | P |
| 1030821 | COG0359J    | gbs2099 | rplI  | Cellular processes                   | Translation, ribosomal structure and biogenesis              | LSU ribosomal protein L9P                                                         | 1.659 | P | P | P | P | P | P | P | 1.182 | P     | P     | P | P | P | P | P | P | P | P |
| 1030960 | COG3887T    | gbs2100 |       | Metabolism and transport             | Central intermediary metabolism                              | Phosphoesterase, DHH family protein                                               | 2.188 | P | P | P | P | P | P | P | 1.292 | P     | P     | P | P | P | P | P | P | P | P |
| 1030341 | COG0445D    | gbs2101 | gidA  | General function predicted only      |                                                              | Putative tRNA (5-carboxymethylaminomethyl-2-thiouridylylate) synthase subunit Gid | 1.420 | P | A | M | A | M | A | A | A     | 1.287 | P     | A | A | A | A | A | A | A | A |
| 1031036 | COG2095U    | gbs2102 |       | Cell Envelope                        | Other                                                        | MarC family integral membrane protein                                             | 2.776 | P | A | A | A | A | A | A | A     | 0.827 | P     | A | A | A | A | A | A | A | A |
| 1030810 | COG0482J    | gbs2103 | trmU  | Cellular processes                   | Translation, ribosomal structure and biogenesis              | tRNA (5-methylaminomethyl-2-thiouridylylate)-methyltransferase (EC 2.1.1.61)      | 2.183 | P | A | A | A | A | A | A | A     | 0.767 | P     | A | A | A | A | A | A | A | A |
| 1031056 | COG1760E    | gbs2104 | sdhB  | Metabolism and transport             | Amino acids, peptides, aminosugars and amines                | L-serine dehydratase beta subunit (EC 4.3.1.17)                                   | 3.552 | P | A | A | A | A | A | A | A     | 2.469 | P     | A | A | A | A | A | A | A | A |
| 1030711 | COG1760E    | gbs2105 | sdhA  | Metabolism and transport             | Amino acids, peptides, aminosugars and amines                | L-serine dehydratase alpha subunit (EC 4.3.1.17)                                  | 1.080 | P | A | P | A | M | A | A | A     | 1.023 | P     | A | M | A | A | A | A | A | A |
| 1031113 | -           | gbs2106 |       | General function predicted only      |                                                              | Transglycosylase SLT domain family protein                                        | 2.358 | P | A | A | A | A | A | A | A     | 1.070 | M     | A | A | A | A | A | A | A | A |
| 1031059 | -           | gbs2107 |       | Cell Envelope                        |                                                              | peptidoglycan binding protein (LysM domain)                                       | 1.    |   |   |   |   |   |   |   |       |       |       |   |   |   |   |   |   |   |   |

|         |          |         |      |                     |               |                                      |       |   |   |   |   |   |   |   |   |       |   |   |   |   |   |   |   |   |   |
|---------|----------|---------|------|---------------------|---------------|--------------------------------------|-------|---|---|---|---|---|---|---|---|-------|---|---|---|---|---|---|---|---|---|
| 1031012 | COG1475K | qbs2134 | parB | Cellular processess | Transcription | Chromosome partitioning protein parB | 1,618 | P | P | P | M | P | P | P | P | 1,242 | P | A | P | A | A | A | A | A | A |
|---------|----------|---------|------|---------------------|---------------|--------------------------------------|-------|---|---|---|---|---|---|---|---|-------|---|---|---|---|---|---|---|---|---|
